# Supplementary material for: Proteome Changes Induced by Imatinib and Novel Imatinib Derivatives in K562 Human Chronic Myeloid Leukemia Cells
Source: Proteomes. 2014 Jul 22;2(3):363–81. doi: 10.3390/proteomes2030363 (PMC5302748; doi:10.3390/proteomes2030363)
Supplement: Supplementary File 1 [file proteomes-02-00363-s001.zip › proteomes-55891 Tablel S2.xls]

## Sheet: Sheet1
Supplementary Table II
Identified proteins in the SILAC experiment in K562 cells after treatment with imatinib and K562 cells after treatment with its derivates
Proteins	Protein name	MW (Da)	pI	Localization	Function	Gl-SK23	Gl-SK16	Gl-SK20	Gl-Y18
P24666	Low molecular weight phosphotyrosine protein phosphatase	18042	6.29	cytoplasm	phosphatase	+	+	+	+
P61158	Actin-related protein 3	47371	5.61	cytoplasm	cilium biogenesis/degradation	+	+	+	-
Q9UKK9	ADP-sugar pyrophosphatase	24328	4.87	intracellular	hydrolase activity	+	+	+	+
P33316	Deoxyuridine 5'-triphosphate nucleotidohydrolase, mitochondrial	26563	9.46	mitochondrion	nucleotide metabolism	+	+	+	+
P49773	Histidine triad nucleotide-binding protein 1	13802	6.43	cytoplasm	signal transduction	+	+	+	+
P24941	Cyclin-dependent kinase 2	33930	8.8	cytoplasm	cell cycle	-	-	+	+
Q00526	Cyclin-dependent kinase 3	35046	8.86	cytoplasm	cell cycle	-	-	+	+
Q16576	Histone-binding protein RBBP7	47820	4.89	nucleus	DNA replication	+	+	+	+
O00571	ATP-dependent RNA helicase DDX3X	73243	6.73	cytoplasm	host-virus interaction	+	-	-	+
Q09666	Neuroblast differentiation-associated protein AHNAK	629101	5.8	nucleus	nervous system development	+	+	+	+
P62805	Histone H4	11367	11.36	chromosome	nucleosome assembly	+	+	+	+
P58546	Myotrophin	12895	5.27	cytoplasm	Promotes dimerization of NF-kappa-B subunits	+	+	+	+
P61758	Prefoldin subunit 3	22658	6.64	cytoplasm	protein folding	+	-	+	+
B2RPK0	Putative high mobility group protein B1-like 1	24238	5.91	chromosome	binds and unwinds DNA	+	+	+	+
P09429	High mobility group protein B1	24894	5.6	chromosome	bends DNA	+	+	+	+
P08758	Annexin A5	35937	4.93	cytoplasm	blood coagulation	+	+	+	+
P26583	High mobility group protein B2	24034	7.62	chromosome	bend DNA	+	+	+	+
Q09028	Histone-binding protein RBBP4	47656	4.74	nucleus	cell cycle	+	+	+	+
O60814	Histone H2B type 1-K	13890	10.31	chromosome	nucleosome assembly	+	+	+	+
P06899	Histone H2B type 1-J	13904	10.31	chromosome	nucleosome assembly	+	+	+	+
P23527	Histone H2B type 1-O	13906	10.31	chromosome	nucleosome assembly	+	+	+	+
P33778	Histone H2B type 1-B	13950	10.31	chromosome	nucleosome assembly	+	+	+	+
P57053	Histone H2B type F-S	13944	10.37	chromosome	nucleosome assembly	+	+	+	+
P58876	Histone H2B type 1-D	13936	10.31	chromosome	nucleosome assembly	+	+	+	+
P62807	Histone H2B type 1-C/E/F/G/I	13906	10.31	chromosome	nucleosome assembly	+	+	+	+
Q16778	Histone H2B type 2-E	13920	10.31	chromosome	nucleosome assembly	+	+	+	+
Q5QNW6	Histone H2B type 2-F	13920	10.31	chromosome	nucleosome assembly	+	+	+	+
Q8N257	Histone H2B type 3-B	13908	10.31	chromosome	nucleosome assembly	+	+	+	+
Q93079	Histone H2B type 1-H	13892	10.31	chromosome	nucleosome assembly	+	+	+	+
Q96A08	Histone H2B type 1-A	14167	10.31	chromosome	nucleosome assembly	+	+	+	+
Q99877	Histone H2B type 1-N	13922	10.31	chromosome	nucleosome assembly	+	+	+	+
Q99879	Histone H2B type 1-M	13989	10.31	chromosome	nucleosome assembly	+	+	+	+
Q99880	Histone H2B type 1-L	13952	10.31	chromosome	nucleosome assembly	+	+	+	+
P17516	Aldo-keto reductase family 1 member C4	37067	6.46	cytoplasm	transformation of dihydrotestosterone into its less active form	+	+	+	+
Q9UNZ2	NSFL1 cofactor p47	40573	4.99	chromosome	fragmentation of Golgi stacks during mitosis	+	+	+	+
P29692	Elongation factor 1-delta	31122	4.9	cytosol	protein biosynthesis	-	+	+	+
P09622	Dihydrolipoyl dehydrogenase, mitochondrial	54177	7.95	mitochondrion	dehydrogenase	+	+	+	+
P04908	Histone H2A type 1-B/E	14135	11.05	nucleus	nucleosome assembly	+	+	+	+
P0C0S8	Histone H2A type 1	14091	10.9	nucleus	nucleosome assembly	+	+	+	+
P20671	Histone H2A type 1-D	14107	10.9	nucleus	nucleosome assembly	+	+	+	+
Q16777	Histone H2A type 2-C	13988	10.9	nucleus	nucleosome assembly	+	+	+	+
Q6FI13	Histone H2A type 2-A	14095	10.9	nucleus	nucleosome assembly	+	+	+	+
Q7L7L0	Histone H2A type 3	14121	11.05	nucleus	nucleosome assembly	+	+	+	+
Q93077	Histone H2A type 3	14121	11.05	nucleus	nucleosome assembly	+	+	+	+
Q96KK5	Histone H2A type 1-H	13906	10.88	nucleus	nucleosome assembly	+	+	+	+
Q99878	Histone H2A type 1-J	13936	10.88	nucleus	nucleosome assembly	+	+	+	+
Q9BTM1	Histone H2A.J	14019	10.9	nucleus	nucleosome assembly	+	+	+	+
P0C0S5	Histone H2A.Z	13553	10.58	nucleus	nucleosome assembly	+	+	+	+
P16104	Histone H2A.x	15145	10.74	chromosome	cell cycle	+	+	+	+
Q71UI9	Histone H2A.V	13509	10.58	nucleus	nucleosome assembly	+	+	+	+
Q96QV6	Histone H2A type 1-A	14234	10.86	nucleus	nucleosome assembly	+	+	+	+
Q8IUE6	Histone H2A type 2-B	13995	10.88	nucleus	nucleosome assembly	+	+	+	+
Q9UII2	ATPase inhibitor, mitochondrial	12249	9.34	mitochondrion	regulates ATP	-	-	+	-
P52895	Aldo-keto reductase family 1 member C2	36735	7.13	cytoplasm	lipid,steroid metabolism	+	+	+	+
Q04828	Aldo-keto reductase family 1 member C1	36788	8.02	cytoplasm	Converts progesterone to its inactive form	+	+	+	+
O43852	Calumenin	37107	4.47	en reticulum	platelet activation,derganulation	+	-	-	+
Q9Y4L1	Hypoxia up-regulated protein 1	111335	5.16	en reticulum	stress response	+	+	+	+
P42229	Signal transducer and activator of transcription 5A	90647	5.98	cytoplasm	transcription	+	+	+	+
P51692	Signal transducer and activator of transcription 5B	89866	5.71	cytoplasm	signal transduction/ transcription	+	+	+	+
P42330	Aldo-keto reductase family 1 member C3	36853	8.06	cytoplasm	conversion of aldehydes and ketones to alcohols	+	+	+	+
P55060	Exportin-2	110417	5.51	cytoplasm	protein transport	+	+	+	+
Q13162	Peroxiredoxin-4	30540	5.86	cytoplasm	I-kappaB phosphorylation	+	+	+	+
Q15008	26S proteasome non-ATPase regulatory subunit 6	45531	5.45	proteasome	regulatory subunit of the 26S proteasome	+	+	+	+
Q99536	Synaptic vesicle membrane protein VAT-1 homolog	41920	5.88	cytoplasm	ATPase activity	+	-	+	-
O95670	V-type proton ATPase subunit G 2	13604	10.26	cytosol	transport (ion, hydrogen)	+	+	+	+
Q06323	Proteasome activator complex subunit 1	28723	5.78	proteasome	cell cycle	-	+	+	-
P30040	Endoplasmic reticulum resident protein 29	28993	6.77	en reticulum	protein folding	+	+	+	+
Q14697	Neutral alpha-glucosidase AB	106874	5.74	en reticulum	cleaves glucose residues	+	+	+	+
P06733	Alpha-enolase	47169	7.01	cell membrane	glycolysis	+	+	+	+
Q15084	Protein disulfide-isomerase A6	48121	4.95	cell membrane	chaperone	+	+	+	+
P07237	Protein disulfide-isomerase	57116	4.76	cell membrane	formation, breakage and rearrangement of disulfide bonds	+	+	+	+
Q06830	Peroxiredoxin-1	22110	8.27	cytoplasm	redox regulation of cell	+	+	+	+
Q8NDC0	MAPK-interacting and spindle-stabilizing protein-like	24269	5.3	unknown	unknown	+	-	+	-
Q9H169	Stathmin-4	22071	5.76	Golgi apparatus	signal transduction	+	+	+	+
P14314	Glucosidase 2 subunit beta	59425	4.33	en reticulum	glycan metabolism	-	+	+	+
Q9ULV4	Coronin-1C	53249	6.65	actin cytoskeleton	cytokinesis	+	+	+	+
Q92945	Far upstream element-binding protein 2	73115	6.85	cytoplasm	transcription	+	+	+	+
P22314	Ubiquitin-like modifier-activating enzyme 1	117849	5.49	unknown	Ubl conjugation pathway	+	+	+	+
P53999	Activated RNA polymerase II transcriptional coactivator p15	14395	9.6	nucleus	transcription	+	+	+	+
Q8IZP2	Putative protein FAM10A4	27407	4.99	cytoplasm	protein refolding	+	+	+	+
Q93045	Stathmin-2	20828	8.4	cytoplasm	microtubule stability	+	+	+	+
Q8NFI4	Putative protein FAM10A5	41378	4.96	cytoplasm	unknown	+	+	+	+
P62191	26S protease regulatory subunit 4	49185	5.87	cytoplasm	degradation of ubiquinated proteins	+	+	+	+
Q96CW1	AP-2 complex subunit mu	49655	9.57	cell membrane	protein transport	+	+	+	-
P50502	Hsc70-interacting protein	41332	5.18	cytoplasm	chaperone	+	+	+	+
P54819	Adenylate kinase 2, mitochondrial	26478	7.67	mitochondrion	transfer of phosphate between ATP-AMP	+	+	+	+
P69891	Hemoglobin subunit gamma-1	16140	6.64	unknown	oxygen transport	+	+	+	+
A6NMY6	Putative annexin A2-like protein	38659	6.49	secreted	heat-stress response	+	+	+	+
O43790	Keratin, type II cuticular Hb6	53501	5.56	intermediate filament/keratin	cytoskeleton organization	+	+	+	+
P12035	Keratin, type II cytoskeletal 3	64417	6.12	intermediate filament/keratin	epithelian cell differentiation	+	+	+	+
P13647	Keratin, type II cytoskeletal 5	62378	7.58	intermediate filament/keratin	epidermis development	+	+	+	+
P14136	Glial fibrillary acidic protein	49880	5.42	intermediate filament/keratin	cell-specific marker	+	+	+	+
P78385	Keratin, type II cuticular Hb3	54195	5.54	intermediate filament/keratin	epidermis development	+	+	+	+
P78386	Keratin, type II cuticular Hb5	55802	6.27	intermediate filament/keratin	epidermis development	+	+	+	+
Q01546	Keratin, type II cytoskeletal 2 oral	65841	8.38	intermediate filament/keratin	cytoskeleton organization	+	+	+	+
Q14533	Keratin, type II cuticular Hb1	54928	5.4	intermediate filament/keratin	unknown	+	+	+	+
Q5XKE5	Keratin, type II cytoskeletal 79	57836	6.75	intermediate filament/keratin	unknown	+	+	+	+
Q8N1N4	Keratin, type II cytoskeletal 78	56866	5.79	intermediate filament/keratin	unknown	+	+	+	+
Q12874	Splicing factor 3A subunit 3	58849	5.27	nucleus	mRNA processing/mRNA splicing	+	+	+	-
P69892	Hemoglobin subunit gamma-2	16126	6.64	cytosol	oxygen transport	+	+	+	+
O00506	Serine/threonine-protein kinase 25	48112	6.27	cytoplasm	stress response	-	+	+	-
Q9P289	Serine/threonine-protein kinase MST4	46529	5.16	cytoplasm	apoptosis	-	+	+	-
Q9Y6E0	Serine/threonine-protein kinase 24	49308	5.49	cytoplasm	apoptosis	-	+	+	-
P11413	Glucose-6-phosphate 1-dehydrogenase	59257	6.39	cytosol	carbohydrate,glucose metabolism	+	+	+	+
O43175	D-3-phosphoglycerate dehydrogenase	56651	6.29	cytosol	aa biosynthesis	+	+	+	+
P16949	Stathmin	17303	5.75	cytoplasm	differentiation	+	+	+	+
O60841	Eukaryotic translation initiation factor 5B	138827	5.39	cytoplasm	protein biosynthesis	+	+	+	+
Q08257	Quinone oxidoreductase	35207	8.56	cytoplasm	one electron transfer	+	-	+	-
P23381	Tryptophan--tRNA ligase, cytoplasmic	53165	5.83	cytoplasm	angiogenesis	+	+	+	+
P62820	Ras-related protein Rab-1A	22678	5.93	en reticulum	protein transport	+	+	+	+
O60888	Protein CutA	19116	5.42	membrane	signal transduction	-	-	+	+
P08670	Vimentin	53652	5.05	intermediate filament	host-virus interaction	+	+	+	+
P32119	Peroxiredoxin-2	21892	5.66	cytoplasm	redox regulation of the cell	+	+	+	+
P02538	Keratin, type II cytoskeletal 6A	60045	8.09	intermediate filament/keratin	cell differentiation	+	+	+	+
P48668	Keratin, type II cytoskeletal 6C	60025	8.09	intermediate filament/keratin	cytoskeleton organization	+	+	+	+
P31947	14-3-3 protein sigma	27774	4.68	cytoplasm	signal transduction	+	+	+	+
P62258	14-3-3 protein epsilon	29174	4.63	cytoplasm	signal transduction	+	+	+	+
Q9BWD1	Acetyl-CoA acetyltransferase, cytosolic	41351	6.46	cytoplasm	lipid metabolic process	+	+	+	+
P30101	Protein disulfide-isomerase A3	56782	5.98	en reticulum	signal transduction	+	+	+	+
Q16181	Septin-7	50680	8.76	cytoskeleton	cell cycle	+	+	+	+
P13667	Protein disulfide-isomerase A4	72932	4.96	en reticulum	Catalyzes the rearrangement of -S-S- bonds in proteins	+	+	+	+
Q9NXG2	THUMP domain-containing protein 1	39315	8.01	unknown	unknown	+	+	+	+
O00193	Small acidic protein	20333	4.57	unknown	unknown	+	+	+	+
P33176	Kinesin-1 heavy chain	109685	6.12	cytoplasm	distribution of mitochondria and lysosomes	+	-	-	-
Q9Y696	Chloride intracellular channel protein 4	28772	5.45	cell membrane	ion transport	+	+	+	+
O94788	Retinal dehydrogenase 2	56724	5.79	cytoplasm	carbohydrate metabolism	+	+	+	+
P61981	14-3-3 protein gamma	28303	4.8	cytoplasm	signal transduction	+	+	+	+
P02100	Hemoglobin subunit epsilon	16203	8.67	hemoglobin complex	oxygen transport/ transport	+	+	+	+
P63104	14-3-3 protein zeta/delta	27745	4.73	cytoplasm	signal transduction	+	+	+	+
Q04917	14-3-3 protein eta	28219	4.76	cytoplasm	signal transduction	+	+	+	+
P25788	Proteasome subunit alpha type-3	28433	5.19	cytoplasm	host-virus interaction	+	-	+	+
P14618	Pyruvate kinase isozymes M1/M2	57937	7.96	cytoplasm	glycolysis	+	+	+	+
Q9BZK3	Putative nascent polypeptide-associated complex subunit alpha-like protein	23306	4.53	unknown	unknown	-	+	+	+
P31946	14-3-3 protein beta/alpha	28082	4.76	cytoplasm	signal transduction	+	+	+	+
P27348	14-3-3 protein theta	27764	4.68	cytoplasm	signal transduction	+	+	+	+
P46109	Crk-like protein	33777	6.26	cytosol	signal transduction	+	+	+	+
P23434	Glycine cleavage system H protein, mitochondrial	18885	4.87	mitochondrion	degradation of glycine	+	+	+	+
Q8WUM4	Programmed cell death 6-interacting protein	96023	6.13	cytoplasm	apoptosis	+	+	+	+
Q9NPH2	Inositol-3-phosphate synthase 1	61068	5.52	cytoplasm	lipid biosynthesis/metabolism	-	-	+	+
O14980	Exportin-1	123386	5.71	cytoplasm	protein transport	+	+	+	+
P53621	Coatomer subunit alpha	138346	7.7	cytoplasm	protein transport	+	+	+	+
P43686	26S protease regulatory subunit 6B	47366	5.09	cytoplasm	ATP-dependent degradation	-	+	+	+
P20290	Transcription factor BTF3	22168	9.41	nucleus	transcription	+	+	+	+
P11766	Alcohol dehydrogenase class-3	39724	7.45	cytoplasm	oxidation of primary alcohols	+	+	+	+
P06753	Tropomyosin alpha-3 chain	32819	4.68	cytoplasm	binds to actin filaments	+	+	+	+
P07951	Tropomyosin beta chain	32851	4.66	cytoplasm	binds to actin filaments	+	+	+	+
P67936	Tropomyosin alpha-4 chain	28522	4.67	cytoplasm	binds to actin filaments	+	+	+	+
P23284	Peptidyl-prolyl cis-trans isomerase B	23743	9.42	en reticulum	protein folding	+	+	+	+
P08729	Keratin, type II cytoskeletal 7	51386	5.39	intermediate filament/keratin	host-virus interaction	+	+	+	+
P17661	Desmin	53536	5.21	cytoplasm	cytoskeleton organization	+	+	+	+
P55786	Puromycin-sensitive aminopeptidase	103276	5.49	cytoplasm	aminopeptidase	+	+	+	+
P30613	Pyruvate kinase isozymes R/L	61830	7.65	cytosol	glycolysis	-	-	+	+
P07355	Annexin A2	38604	7.57	secreted	heat-stress response	+	+	+	+
P20073	Annexin A7	52739	5.52	cytosol	membrane fusion	+	+	+	+
P09972	Fructose-bisphosphate aldolase C	39456	6.41	cytosol	glycolysis	+	+	+	+
Q9NPJ3	Acyl-coenzyme A thioesterase 13	14960	9.23	cytoplasm	hydrolysis of acyl-CoAs to fatty acids and coA	-	-	+	-
P27797	Calreticulin	48142	4.29	cytoplasm	chaperone	+	+	+	+
Q9GZV4	Eukaryotic translation initiation factor 5A-2	16793	5.38	cytoplasm	protein biosynthesis	+	+	+	+
Q9NSB2	Keratin, type II cuticular Hb4	64842	7.74	intermediate filament/keratin	hair and nail development	+	+	+	+
P30044	Peroxiredoxin-5, mitochondrial	22086	8.93	cytoplasm	reduces hydrogen peroxide	+	+	+	+
O43399	Tumor protein D54	22238	5.26	perinuclear region of cytoplasm	regulation of cell proliferation	+	+	+	+
P04792	Heat shock protein beta-1	22783	5.98	cytoplasm	stress response	+	+	+	+
O43768	Alpha-endosulfine	13389	6.61	cytoplasm	cell cycle	+	-	+	+
Q12931	Heat shock protein 75 kDa, mitochondrial	80110	8.3	mitochondrion	chaperone with ATPase activity	-	-	+	-
P24752	Acetyl-CoA acetyltransferase, mitochondrial	45200	8.98	mitochondrion	ketone body metabolism	+	+	+	+
O75822	Eukaryotic translation initiation factor 3 subunit J	29062	4.72	cytoplasm	protein biosynthesis	-	+	+	+
Q6IS14	Eukaryotic translation initiation factor 5A-1-like	16773	4.85	cytoplasm	protein biosynthesis	+	+	+	+
P21281	V-type proton ATPase subunit B, brain isoform	56501	5.57	membrane	hydrogen ion transport	+	+	+	+
P30405	Peptidyl-prolyl cis-trans isomerase F, mitochondrial	22040	9.49	mitochondrion	accelerate protein folding	+	+	+	+
P06493	Cyclin-dependent kinase 1	34095	8.38	cytoplasm	apoptosis	+	+	+	+
O14602	Eukaryotic translation initiation factor 1A, Y-chromosomal	16442	5.07	cytoplasm	protein biosynthesis	+	+	+	+
P47813	Eukaryotic translation initiation factor 1A, X-chromosomal	16460	5.07	cytosol	protein biosynthesis	+	+	+	+
P55263	Adenosine kinase	40545	6.24	nucleus	purine salvage	+	+	+	+
P52209	6-phosphogluconate dehydrogenase, decarboxylating	53140	6.8	cytoplasm	pentose shunt	+	+	+	+
Q13765	Nascent polypeptide-associated complex subunit alpha	23384	4.52	cytoplasm	protein transport	+	+	+	+
P41250	Glycine--tRNA ligase	83166	6.61	cytoplasm	protein biosynthesis	+	+	+	+
P37837	Transaldolase	37540	6.36	cytoplasm	pentose shunt	+	+	+	+
O43765	Small glutamine-rich tetratricopeptide repeat-containing protein alpha	34063	4.79	cytoplasm	host-virus interaction	+	+	+	-
P38646	Stress-70 protein, mitochondrial	73680	5.87	mitochondrion	cell proliferation and cellular aging	+	+	+	+
P49321	Nuclear autoantigenic sperm protein	85238	4.26	cytoplasm	cell cycle	+	+	+	+
P50454	Serpin H1	46441	8.75	en reticulum	stress response	-	-	+	-
Q13185	Chromobox protein homolog 3	20811	5.23	nucleus	transcripton	+	+	+	+
P63151	Serine/threonine-protein phosphatase 2A 55 kDa regulatory subunit B alpha isoform	51692	5.82	cytosol	signal transduction	-	-	+	-
Q00005	Serine/threonine-protein phosphatase 2A 55 kDa regulatory subunit B beta isoform	51710	6.01	cytoplasm	apoptosis	-	-	+	-
Q66LE6	Serine/threonine-protein phosphatase 2A 55 kDa regulatory subunit B delta isoform	52042	5.96	cytoplasm	cell cycle	-	-	+	-
P02008	Hemoglobin subunit zeta	15637	7.94	hemoglobin complex	oxygen transport	+	+	+	+
O75608	Acyl-protein thioesterase 1	26640	6.28	cytoplasm	fatty acid, lipid metabolism	-	+	+	-
P10599	Thioredoxin	11737	4.82	cytoplasm	e transport	+	+	+	+
P41219	Peripherin	53651	5.37	intermediate filament	intermediate filament cytoskeleton organization	+	+	+	+
Q96GU1	G antigen family E member 1	14046	4.27	unknown	unknown	+	+	+	+
O95678	Keratin, type II cytoskeletal 75	59560	7.6	intermediate filament/keratin	hair and nail formation	+	+	+	+
P23396	40S ribosomal protein S3	26688	9.68	cytosolic large ribosomal subunit	translation	+	+	+	+
P24534	Elongation factor 1-beta	24764	4.5	cytosol	protein biosynthesis	-	+	+	+
Q7Z406	Myosin-14	227871	5.52	cytoplasm	cell shape	-	+	+	+
P22087	rRNA 2'-O-methyltransferase fibrillarin	33784	10.18	nucleus	rRNA processing	+	+	+	+
Q99460	26S proteasome non-ATPase regulatory subunit 1	105836	5.24	proteasome	Acts as a regulatory subunit of the 26 proteasome	+	+	+	+
P09493	Tropomyosin alpha-1 chain	32709	4.69	cytoplasm	binds to actin filaments	+	+	+	+
P07339	Cathepsin D	44552	6.1	lysosome	protein breakdown	+	+	+	+
Q96QK1	Vacuolar protein sorting-associated protein 35	91707	5.32	cytoplasm	protein transport	+	-	-	-
O43684	Mitotic checkpoint protein BUB3	37155	6.36	centromere	cell cycle	+	+	+	-
Q14847	LIM and SH3 domain protein 1	29717	6.61	cytoplasm	ion transport	+	+	+	+
Q9Y281	Cofilin-2	18737	7.66	cytoskeleton	actin cytoskeleton organization	+	+	+	+
P62495	Eukaryotic peptide chain release factor subunit 1	49031	5.51	cytoplasm	protein biosynthesis	+	+	+	+
Q9BZZ5	Apoptosis inhibitor 5	59005	6.99	cytoplasm	apoptosis	-	-	+	-
P60174	Triosephosphate isomerase	30791	5.65	cytosol	gluconeogenesis/glycolysis	+	+	+	+
P40763	Signal transducer and activator of transcription 3	88068	5.94	cytoplasm	transcription	-	-	+	-
P29401	Transketolase	67878	7.58	cytosol	transfers two-carbon ketol group	+	+	+	+
Q13263	Transcription intermediary factor 1-beta	88550	5.52	nucleus	transcription	+	+	+	+
P63241	Eukaryotic translation initiation factor 5A-1	16832	5.07	cytoplasm	protein biosynthesis	+	+	+	+
P43490	Nicotinamide phosphoribosyltransferase	55521	6.69	cytoplasm	pyridine nucleotide biosynthesis	+	+	+	+
Q99497	Protein DJ-1	19891	6.32	cytoplasm	autophagy	+	+	+	+
O14773	Tripeptidyl-peptidase 1	61248	6.01	lysosome	peptidase	+	+	+	-
P00491	Purine nucleoside phosphorylase	32118	6.45	cytoplasm	purine base metabolic process	+	+	+	+
P10809	60 kDa heat shock protein, mitochondrial	61055	5.7	mitochondrion	host-virus interaction	+	+	+	+
Q9NQ29	Putative RNA-binding protein Luc7-like 1	43728	9.95	nucleus	RNA binding	+	+	+	+
P26639	Threonine--tRNA ligase, cytoplasmic	83435	6.23	cytoplasm	protein biosynthesis	+	+	+	+
Q13200	26S proteasome non-ATPase regulatory subunit 2	100200	5.08	proteasome	Acts as a regulatory subunit of the 26 proteasome	+	+	+	+
P53675	Clathrin heavy chain 2	187030	5.57	membrane	protein transport	+	+	+	+
O75874	Isocitrate dehydrogenase [NADP] cytoplasmic	46659	6.53	cytoplasm	tricarboxylic acid cycle	+	+	+	+
Q9Y383	Putative RNA-binding protein Luc7-like 2	46514	10.02	nucleus	binds RNA(via its Arg/Ser-rich domain)	+	+	+	+
P11021	78 kDa glucose-regulated protein	72333	5.07	en reticulum	protein assembly	+	+	+	+
P40925	Malate dehydrogenase, cytoplasmic	36426	6.91	cytoplasm	tricarboxylic acid cycle	+	+	+	+
P10768	S-formylglutathione hydrolase	31463	6.54	cytoplasm	Serine hydrolase involved in the detoxification of formaldehyde	+	+	+	+
P31942	Heterogeneous nuclear ribonucleoprotein H3	36926	6.37	nucleus	mRNA processing	-	+	+	-
O95721	Synaptosomal-associated protein 29	28970	5.56	cytoplasm	protein transport	+	+	+	+
P62937	Peptidyl-prolyl cis-trans isomerase A	18012	7.68	cytoplasm	host-virus interaction	+	+	+	+
Q15435	Protein phosphatase 1 regulatory subunit 7	41564	4.84	nucleus	regulatory subunit	+	+	+	+
Q7KZF4	Staphylococcal nuclease domain-containing protein 1	101997	6.74	cytoplasm	host-virus interaction	+	+	+	+
Q15185	Prostaglandin E synthase 3	18697	4.32	cytoplasm	prostaglandin biosynthesis	+	+	+	+
P13489	Ribonuclease inhibitor	49973	4.71	cytoplasm	mRNA catabolic process	+	+	+	+
P23528	Cofilin-1	18502	8.22	cytoskeleton	cytoskeleton organization	+	+	+	+
P45974	Ubiquitin carboxyl-terminal hydrolase 5	95786	4.91	lysosome	Ubl conjugation pathway	+	+	+	+
P62158	Calmodulin	16838	4.09	cytoplasm	response to Ca ions	+	+	+	+
P55854	Small ubiquitin-related modifier 3	11637	5.32	cytoplasm	Ubl conjugation pathway	+	+	+	+
Q6EEV6	Small ubiquitin-related modifier 4	10685	6.57	unknown	Ubl conjugation pathway	+	+	+	+
Q99436	Proteasome subunit beta type-7	29965	7.58	cytoplasm	host-virus interaction	-	-	+	-
P28482	Mitogen-activated protein kinase 1	41390	6.5	cytoplasm	apoptosis	+	+	+	+
P55010	Eukaryotic translation initiation factor 5	49223	5.41	cytosol	protein biosynthesis	-	-	-	+
Q9Y6G9	Cytoplasmic dynein 1 light intermediate chain 1	56579	6.01	cytoplasm	cell cycle	-	-	+	-
O43396	Thioredoxin-like protein 1	32251	4.84	cytoplasm	e transport	+	+	+	+
P63167	Dynein light chain 1, cytoplasmic	10366	6.89	cytoplasm	apoptosis	+	+	+	+
Q5SSJ5	Heterochromatin protein 1-binding protein 3	61207	9.69	chromosome	chromatine structure	+	-	+	-
P28072	Proteasome subunit beta type-6	25358	4.8	cytoplasm	host-virus interaction	+	+	+	+
P13804	Electron transfer flavoprotein subunit alpha, mitochondrial	35080	8.62	mitochondrion	e transport	+	+	+	+
P63010	AP-2 complex subunit beta	104553	5.22	cell membrane	protein transport	-	-	+	-
Q10567	AP-1 complex subunit beta-1	104637	4.94	membrane	protein transport	-	-	+	-
P07384	Calpain-1 catalytic subunit	81890	5.49	cytoplasm	proteolysis	-	+	+	+
P13639	Elongation factor 2	95338	6.41	cytoplasm	protein biosynthesis	+	+	+	+
Q13158	Protein FADD	23279	5.48	cytosol	apoptosis	+	+	+	-
P61086	Ubiquitin-conjugating enzyme E2 K	22407	5.33	cytoplasm	Ubl conjugation pathway	+	+	+	+
P10412	Histone H1.4	21865	11.03	chromosome	nucleosome assembly	+	+	+	+
P16402	Histone H1.3	22350	11.02	chromosome	nucleosome assembly	+	+	+	+
P07737	Profilin-1	15054	8.44	cytoplasm	actin cytoskeleton organization	+	+	+	+
Q01105	Protein SET	33489	4.22	cytoplasm	apoptosis	+	+	+	+
P52907	F-actin-capping protein subunit alpha-1	32923	5.45	cytoplasm	binds Ca ions	+	+	+	+
Q8IYD1	Eukaryotic peptide chain release factor GTP-binding subunit ERF3B	68813	5.3	cytoplasm	cell cycle	+	+	+	+
O00231	26S proteasome non-ATPase regulatory subunit 11	47464	6.08	proteasome	ATP-dependent degradation	+	+	+	+
Q9Y536	Peptidyl-prolyl cis-trans isomerase A-like 4A/B/C	18182	9.32	cytoplasm	protein folding	+	+	+	+
P12277	Creatine kinase B-type	46644	5.34	cytoplasm	transfer of phosphate	+	+	+	+
Q92499	ATP-dependent RNA helicase DDX1	82432	6.8	cytoplasm	transcription	-	+	+	+
P28838	Cytosol aminopeptidase	56166	8.03	cytoplasm	turnover of intracellular proteins	+	+	+	+
P05787	Keratin, type II cytoskeletal 8	53704	5.52	intermediate filament/keratin	host-virus interaction	+	+	+	+
Q9Y2V2	Calcium-regulated heat stable protein 1	15892	8.41	cytoplasm	binds mRNA and single-stranded DNA	+	+	+	+
P14649	Myosin light chain 6B	22764	5.56	cytosol	skeletal muscle tissue development	+	+	+	+
P47755	F-actin-capping protein subunit alpha-2	32949	5.57	cytosol	actin cytoskeleton organization	+	+	+	+
P61956	Small ubiquitin-related modifier 2	10871	5.32	nucleus	Ubl conjugation pathway	+	+	+	+
P30086	Phosphatidylethanolamine-binding protein 1	21057	7.01	cytoplasm	response to stress conditions	+	+	+	+
Q56UQ5	TPT1-like protein	15757	5.81	unknown	unknown	+	+	+	+
Q15257	Serine/threonine-protein phosphatase 2A activator	40668	5.63	cytoplasm	accelerate protein folding	+	+	+	+
P69905	Hemoglobin subunit alpha	15258	8.72	cytsolic small ribosomal subunit	oxygen transport	-	+	+	+
P25789	Proteasome subunit alpha type-4	29484	7.58	cytoplasm	host-virus interaction	+	+	+	+
P30085	UMP-CMP kinase	22222	5.44	cytoplasm	pyrimidine biosynthesis	+	+	+	+
P05771	Protein kinase C beta type	76869	6.57	cytoplasm	apoptosis	-	-	+	-
P17252	Protein kinase C alpha type	76750	6.61	cytoplasm	apoptosis	-	-	+	-
P15311	Ezrin	69413	5.94	cell membrane	cell shape	+	+	+	+
P47756	F-actin-capping protein subunit beta	31350	5.36	cytoplasm	cytoskeleton organization	+	+	+	+
O60664	Perilipin-3	47075	5.3	cytoplasm	transport	+	+	+	+
P13693	Translationally-controlled tumor protein	19595	4.84	cytoplasm	Ca bindind/microtubule stabilization	+	+	+	+
P16403	Histone H1.2	21365	10.94	chromosome	nucleosome assembly	+	+	+	+
Q9BYZ2	L-lactate dehydrogenase A-like 6B	41943	8.88	cytoplasm	glycolysis	-	+	+	+
P49792	E3 SUMO-protein ligase RanBP2	358199	5.86	nucleus	protein transport	-	-	+	-
P35580	Myosin-10	228999	5.43	myosin complex	cell shape	+	+	+	+
P17980	26S protease regulatory subunit 6A	49204	5.13	cytoplasm	host-virus interaction	+	+	+	+
P08107	Heat shock 70 kDa protein 1A/1B	70052	5.47	cytoplasm	stress response	+	+	+	+
P51858	Hepatoma-derived growth factor	26788	4.7	cytoplasm	transcription	+	+	+	+
Q96IU4	Abhydrolase domain-containing protein 14B	22346	5.94	cytoplasm	hydrolase activity	+	+	+	+
P00558	Phosphoglycerate kinase 1	44615	8.3	cytoplasm	glycolysis	+	+	+	+
P62714	Serine/threonine-protein phosphatase 2A catalytic subunit beta isoform	35575	5.21	centromere	modulate the activity of some kinases	+	+	+	+
Q9Y265	RuvB-like 1	50228	6.02	nucleus	cell cycle	+	+	+	+
P61088	Ubiquitin-conjugating enzyme E2 N	17138	6.13	cytoplasm	Ubl conjugation pathway	+	+	+	+
P60660	Myosin light polypeptide 6	16930	4.56	cytosol	skeletal muscle tissue development	+	+	+	+
P30041	Peroxiredoxin-6	23035	6	cytoplasm	lipid degradation	+	+	+	+
Q9UL46	Proteasome activator complex subunit 2	27402	5.54	proteasome	unknown	+	+	+	+
P62736	Actin, aortic smooth muscle	42009	5.24	cytoskeleton	cell motility	+	+	+	+
P63267	Actin, gamma-enteric smooth muscle	41877	5.31	cytoplasm	Muscle contraction	+	+	+	+
P35749	Myosin-11	227339	5.42	thick filament	Muscle contraction	-	+	+	+
P35241	Radixin	68564	6.03	cell membrane	binds actin filaments to the plasma membrane	+	+	+	+
P22492	Histone H1t	22019	11.71	chromosome	spermatogenesis	+	+	+	+
Q02539	Histone H1.1	21842	10.99	chromosome	binds DNA	+	+	+	+
P34931	Heat shock 70 kDa protein 1-like	70375	5.75	cytosol	chaperone	+	+	+	+
P68036	Ubiquitin-conjugating enzyme E2 L3	17862	8.68	cytoplasm	Ubl conjugation pathway	+	+	+	+
Q96HC4	PDZ and LIM domain protein 5	63945	8.55	cytoplasm	regulation of synapse assembly	-	+	+	-
P40926	Malate dehydrogenase, mitochondrial	35503	8.92	mitochondrion	tricarboxylic acid cycle	+	+	+	+
Q562R1	Beta-actin-like protein 2	42003	5.39	cytoplasm	unknown	+	+	+	+
P60891	Ribose-phosphate pyrophosphokinase 1	34834	6.51	cytosol	nucleotide biosynthesis	-	+	+	+
P43487	Ran-specific GTPase-activating protein	23310	5.19	cytoplasm	signal transduction	+	+	+	+
Q08170	Serine/arginine-rich splicing factor 4	56678	11.52	nucleus	mRNA processing/mRNA splicing	+	+	+	+
Q13247	Serine/arginine-rich splicing factor 6	39587	11.42	nucleus	mRNA processing/mRNA splicing	+	+	+	+
P12004	Proliferating cell nuclear antigen	28769	4.57	nucleus	DNA replication	+	+	+	+
Q9BTT0	Acidic leucine-rich nuclear phosphoprotein 32 family member E	30692	3.76	ctoplasm	Inhibits activity of PP2A	+	+	+	+
P49721	Proteasome subunit beta type-2	22836	6.52	cytoplasm	host-virus interaction	+	+	+	+
P68371	Tubulin beta-4B chain	49831	4.79	cytoskeleton	binds GTP (2 molecules)	+	+	+	+
Q13404	Ubiquitin-conjugating enzyme E2 variant 1	16495	7.71	nucleus	Ubl conjugation pathway	+	+	+	+
P42704	Leucine-rich PPR motif-containing protein, mitochondrial	157905	5.81	mitochondrion	transcription	+	+	+	+
P22392	Nucleoside diphosphate kinase B	17298	8.52	cytoplasm	nucleotide metabolism	+	+	+	+
O00410	Importin-5	123630	4.83	cytoplasm	protein transport	+	+	+	+
Q8NC51	Plasminogen activator inhibitor 1 RNA-binding protein	44965	8.66	cytoplasm	regulation of mRNA stability	+	+	+	+
P04350	Tubulin beta-4A chain	49586	4.78	cytoskeleton	binds GTP (2 molecules)	+	+	+	+
P62328	Thymosin beta-4	5053	5.02	cytoplasm	cytoskeleton organization	+	+	+	+
Q15819	Ubiquitin-conjugating enzyme E2 variant 2	16363	7.79	nucleus	Ubl conjugation pathway	+	+	+	+
P35606	Coatomer subunit beta'	102487	5.14	cytoplasm	protein transport	+	+	+	+
P62826	GTP-binding nuclear protein Ran	24423	7.01	cytoplasm	cell cycle	+	+	+	+
Q00013	55 kDa erythrocyte membrane protein	52296	6.91	cell membrane	signal transduction	+	+	+	+
Q13509	Tubulin beta-3 chain	50433	4.83	cytoplasm	binds GTP (2 molecules)	+	+	+	+
O43143	Putative pre-mRNA-splicing factor ATP-dependent RNA helicase DHX15	90933	7.12	nucleus	mRNA processing/mRNA splicing	-	+	+	+
P34932	Heat shock 70 kDa protein 4	94331	5.1	cytoplasm	stress response	+	+	+	+
P15170	Eukaryotic peptide chain release factor GTP-binding subunit ERF3A	55756	5.44	intracellular	protein biosynthesis	+	+	+	+
P50995	Annexin A11	54390	7.53	cytoplasm	cell cycle	+	+	+	+
Q9Y617	Phosphoserine aminotransferase	40423	7.56	cytosol	aa biosynthesis	+	+	+	+
Q96K17	Transcription factor BTF3 homolog 4	17271	5.95	unknown	unknown	+	+	+	+
P49593	Protein phosphatase 1F	49831	4.99	cytosol	apoptosis	+	+	+	-
P05455	Lupus La protein	46837	6.68	nucleus	protect RNA polymesase from exonuclease digestion	+	+	+	+
P60900	Proteasome subunit alpha type-6	27399	6.34	cytoplasm	cleaves peptides	+	+	+	+
P68032	Actin, alpha cardiac muscle 1	42019	5.23	cytoplasm	cell motility	+	+	+	+
P68133	Actin, alpha skeletal muscle	42051	5.23	cytoplasm	cell motility	+	+	+	+
P09382	Galectin-1	14716	5.3	extracellular matrix	apoptosis	+	+	+	+
P35579	Myosin-9	226532	5.5	cytoplasm	cell shape	+	+	+	+
O43707	Alpha-actinin-4	104854	5.27	cytoplasm	protein transport	+	+	+	+
Q9Y3A5	Ribosome maturation protein SBDS	28764	8.91	cytoplasm	ribosome biogenesis	-	+	+	+
P60842	Eukaryotic initiation factor 4A-I	46154	5.32	cytosol	protein biosynthesis	+	+	+	+
P54920	Alpha-soluble NSF attachment protein	33233	5.23	membrane	protein transport	-	-	+	-
Q92688	Acidic leucine-rich nuclear phosphoprotein 32 family member B	28788	3.93	cytoplasm	cell cycle	+	+	+	+
Q9BQE3	Tubulin alpha-1C chain	49895	4.96	cytoskeleton	binds GTP (2 molecules)	+	+	+	+
Q15365	Poly(rC)-binding protein 1	37498	6.66	cytoplasm	binds proteins	+	+	+	+
P25787	Proteasome subunit alpha type-2	25899	6.91	cytoplasm	cleaves peptides	+	+	+	+
P15531	Nucleoside diphosphate kinase A	17149	5.81	cytoplasm	nucleotide metabolism	+	+	+	+
P07205	Phosphoglycerate kinase 2	44796	8.74	cytoplasm	glycolysis	+	+	+	+
Q9BXP5	Serrate RNA effector molecule homolog	100666	5.7	cytoplasm	RNA-mediated gene silencing	+	+	+	-
P30566	Adenylosuccinate lyase	54889	6.68	mitochondrion	purine biosynthesis	+	+	+	-
P60709	Actin, cytoplasmic 1	41737	5.29	cytoplasm	unknown	+	+	+	+
A6NKZ8	Putative tubulin beta chain-like protein ENSP00000290377	41775	4.77	cytoplasm	binds GTP (2 molecules)	+	+	+	+
Q9H4B7	Tubulin beta-1 chain	50327	5.05	cytoplasm	binds GTP (2 molecules)	+	+	+	+
P63261	Actin, cytoplasmic 2	41793	5.31	cytoplasm	unknown	+	+	+	+
Q71U36	Tubulin alpha-1A chain	50136	4.94	cytoskeleton	binds GTP (2 molecules)	+	+	+	+
P68363	Tubulin alpha-1B chain	50152	4.94	cytoskeleton	binds GTP (2 molecules)	+	+	+	+
P07437	Tubulin beta chain	49671	4.78	cytoskeleton	binds GTP (2 molecules)	+	+	+	+
P39687	Acidic leucine-rich nuclear phosphoprotein 32 family member A	28585	3.98	cytoplasm	transcription	+	+	+	+
P07954	Fumarate hydratase, mitochondrial	54637	8.85	cytoplasm	tricarboxylic acid cycle	+	+	+	+
Q15631	Translin	26183	6.01	cytoplasm	DNA recombination	+	+	+	+
Q15427	Splicing factor 3B subunit 4	44386	8.55	nucleus	mRNA processing/mRNA splicing	+	+	+	+
Q13885	Tubulin beta-2A chain	49907	4.78	cytoskeleton	binds GTP (2 molecules)	+	+	+	+
Q9BVA1	Tubulin beta-2B chain	49953	4.78	cytoskeleton	binds GTP (2 molecules)	+	+	+	+
Q13748	Tubulin alpha-3C/D chain	49960	4.98	cytoskeleton	binds GTP (2 molecules)	+	+	+	+
Q6PEY2	Tubulin alpha-3E chain	49859	5.01	cytoskeleton	binds GTP (2 molecules)	+	+	+	+
Q9Y5K5	Ubiquitin carboxyl-terminal hydrolase isozyme L5	37607	5.23	cytoplasm	DNA damage,repair, recombination	+	-	+	+
P09104	Gamma-enolase	47269	4.91	cell membrane	glycolysis	+	+	+	+
P13929	Beta-enolase	46932	7.58	cytoplasm	glycolysis	+	+	+	+
P00441	Superoxide dismutase [Cu-Zn]	15936	5.7	cytoplasm	destroys radicals	+	+	+	+
Q96PZ0	Pseudouridylate synthase 7 homolog	75035	5.98	unknown	tRNA processing	-	-	+	-
P54652	Heat shock-related 70 kDa protein 2	70021	5.55	CatSper complex/cell surface	stress response	+	+	+	+
Q14568	Putative heat shock protein HSP 90-alpha A2	39365	4.57	cytoplasm	stress response	+	+	+	+
A6NNZ2	Tubulin beta-8 chain-like protein LOC260334	49573	4.75	cytoskeleton	binds GTP (2 molecules)	+	+	+	+
Q3ZCM7	Tubulin beta-8 chain	49776	4.79	cytoskeleton	binds GTP (2 molecules)	+	+	+	+
P68366	Tubulin alpha-4A chain	49924	4.93	cytoplasm	binds GTP (2 molecules)	+	+	+	+
Q00796	Sorbitol dehydrogenase	38325	8.23	cell projection	Converts sorbitol to fructose	-	-	+	-
P09211	Glutathione S-transferase P	23356	5.43	cytoplasm	cellular response	+	+	+	+
O75348	V-type proton ATPase subunit G 1	13758	8.93	cytosol	ion,hydrogen transport	+	+	+	+
P12814	Alpha-actinin-1	103058	5.25	cell membrane	anchors actin	+	+	+	+
P31948	Stress-induced-phosphoprotein 1	62639	6.4	cytoplasm	stress response	+	+	+	+
P04406	Glyceraldehyde-3-phosphate dehydrogenase	36053	8.57	cytoplasm	glycolysis	+	+	+	+
P00338	L-lactate dehydrogenase A chain	36689	8.44	cytoplasm	glycolysis	+	+	+	+
Q9H299	SH3 domain-binding glutamic acid-rich-like protein 3	10438	4.82	cytoplasm	cell redox homeostasis	+	+	+	+
P14868	Aspartate--tRNA ligase, cytoplasmic	57136	6.11	cytoplasm	protein biosynthesis	+	+	+	+
Q9BUF5	Tubulin beta-6 chain	49857	4.77	cytoplasm	binds GTP (2 molecules)	+	+	+	+
P16401	Histone H1.5	22580	10.91	chromosome	nucleosome assembly	+	+	+	+
O75832	26S proteasome non-ATPase regulatory subunit 10	24428	5.71	cytoplasm	apoptosis	+	+	+	+
P31939	Bifunctional purine biosynthesis protein PURH	64616	6.27	cytosol	purine biosynthesis	+	+	+	+
Q9P2J5	Leucine--tRNA ligase, cytoplasmic	134466	6.95	cytoplasm	protein biosynthesis	+	+	+	+
Q2VIR3	Putative eukaryotic translation initiation factor 2 subunit 3-like protein	51299	8.67	unknown	protein biosynthesis	+	+	+	+
P61604	10 kDa heat shock protein, mitochondrial	10932	8.89	mitochondrion	stress response	+	-	+	+
Q9BR76	Coronin-1B	54235	5.6	cytoplasm	signal transduction	+	+	+	-
P28066	Proteasome subunit alpha type-5	26411	4.74	cytoplasm	cleave peptides	+	+	+	+
P50395	Rab GDP dissociation inhibitor beta	50663	6.1	cytoplasm	Regulates the GDP/GTP exchange reaction	+	+	+	+
P26038	Moesin	67820	6.08	cell membrane	cytoskeleton organization	+	+	+	+
P37802	Transgelin-2	22391	8.41	nuclear membrane	muscle organ development	+	+	+	+
P48444	Coatomer subunit delta	57210	5.89	cytoplasm	protein transport	-	+	+	+
O14950	Myosin regulatory light chain 12B	19779	4.69	cytosol	regulation of contractile activity	+	+	+	+
P19105	Myosin regulatory light chain 12A	19794	4.65	myosin complex	regulation of contractile activity	+	+	+	+
O14737	Programmed cell death protein 5	14285	5.77	cytoplasm	apoptosis	+	+	+	+
Q15428	Splicing factor 3A subunit 2	49256	9.65	nucleus	mRNA processing/mRNA splicing	-	-	+	+
Q8WU68	Splicing factor U2AF 26 kDa subunit	25744	6.7	nucleus	mRNA processing/mRNA splicing	+	+	+	+
O75340	Programmed cell death protein 6	21868	5.16	en reticulum	apoptosis	+	+	+	+
P0CG47	Polyubiquitin-B	25762	6.86	cytoplasm	have different functions depending on the Lys residue of the ubiquitin that is linked	+	+	+	+
P0CG48	Polyubiquitin-C	77039	7.16	cytoplasm	have different functions depending on the Lys residue of the ubiquitin that is linked	+	+	+	+
P62979	Ubiquitin-40S ribosomal protein S27a	17965	9.68	cytoplasm	have different functions depending on the Lys residue of the ubiquitin that is linked	+	+	+	+
P62987	Ubiquitin-60S ribosomal protein L40	14728	9.87	cytoplasm	have different functions depending on the Lys residue of the ubiquitin that is linked	+	+	+	+
Q9BUL8	Programmed cell death protein 10	24702	7.8	cytoplasm	apoptosis	+	+	+	+
P50991	T-complex protein 1 subunit delta	57924	7.96	cytoplasm	chaperone	+	+	+	+
O43324	Eukaryotic translation elongation factor 1 epsilon-1	19811	8.55	cytoplasm	protein biosynthesis	+	+	+	-
P25786	Proteasome subunit alpha type-1	29556	6.15	cytoplasm	immunity	+	+	+	-
P49915	GMP synthase [glutamine-hydrolyzing]	76715	6.42	cytoplasm	GMP biosynthesis	+	+	+	+
P36776	Lon protease homolog, mitochondrial	106489	6.01	mitochondrion	stress response	-	-	+	-
O60832	H/ACA ribonucleoprotein complex subunit 4	57674	9.46	cytoplasm	ribosome biogenesis	+	-	+	+
P28074	Proteasome subunit beta type-5	28480	6.44	cytoplasm	host-virus interaction	-	+	+	+
P17066	Heat shock 70 kDa protein 6	71028	5.81	unknown	stress response	+	+	+	+
Q9Y230	RuvB-like 2	51157	5.49	cytoplasm	DNA damage,recomdination,repair	+	+	+	+
A2RTX5	Probable threonine--tRNA ligase 2, cytoplasmic	92646	5.74	cytoplasm	protein biosynthesis	-	-	+	+
P07195	L-lactate dehydrogenase B chain	36638	5.71	cytoplasm	glycolysis	+	+	+	+
P38117	Electron transfer flavoprotein subunit beta	27844	8.25	mitochondrion	e transport	-	-	+	-
P49006	MARCKS-related protein	19529	4.65	plasma membrane	signal transduction	+	+	+	+
P19338	Nucleolin	76614	4.6	cytoplasm	angiogenesis	+	+	+	+
P00492	Hypoxanthine-guanine phosphoribosyltransferase	24579	6.21	cytoplasm	purine salvage	+	+	+	+
Q05639	Elongation factor 1-alpha 2	50470	9.11	nucleus	protein biosynthesis	+	+	+	+
P54578	Ubiquitin carboxyl-terminal hydrolase 14	56069	5.2	cytoplasm	Ubl conjugation pathway	+	+	+	+
P11142	Heat shock cognate 71 kDa protein	70898	5.37	cytoplasm	stress response	+	+	+	+
P21108	Ribose-phosphate pyrophosphokinase 3	34839	5.92	unknown	nucleotide biosynthesis	-	+	+	+
Q9Y2X3	Nucleolar protein 58	59578	9.03	nucleus	ribosome biogenesis	+	-	+	+
Q9UBT2	SUMO-activating enzyme subunit 2	71224	5.14	nucleus	Ubl conjugation pathway	+	+	+	+
O75223	Gamma-glutamylcyclotransferase	21008	5.07	cytosol	glutathione biosynthetic process	-	+	+	-
Q14240	Eukaryotic initiation factor 4A-II	46402	5.33	cytosol	protein biosynthesis	+	+	+	+
P41252	Isoleucine--tRNA ligase, cytoplasmic	144498	5.82	cytoplasm	protein biosynthesis	+	+	+	+
P40227	T-complex protein 1 subunit zeta	58024	6.24	cyoplasm	chaperone	+	+	+	+
P67775	Serine/threonine-protein phosphatase 2A catalytic subunit alpha isoform	35594	5.3	centromere	meiosis	+	+	+	+
P67870	Casein kinase II subunit beta	24942	5.33	cytosol	Wnt receptor signaling pathway	-	+	+	+
O60361	Putative nucleoside diphosphate kinase	15529	8.76	unknown	nucleotide metabolism	+	+	+	+
Q9H853	Putative tubulin-like protein alpha-4B	27551	7.71	cytoplasm	protein polymerization	+	-	+	+
O14818	Proteasome subunit alpha type-7	27887	8.6	cytoplasm	host-virus interaction	+	+	+	+
Q9NR45	Sialic acid synthase	40308	6.29	cytoplasm	lipopolysaccharide biosynthetic process	+	+	+	+
P49411	Elongation factor Tu, mitochondrial	49542	7.26	mitochondrion	protein biosynthesis	+	+	+	+
Q9UBQ7	Glyoxylate reductase/hydroxypyruvate reductase	35668	7.01	peroxisomal matrix	excretion	+	+	+	+
Q16186	Proteasomal ubiquitin receptor ADRM1	42153	4.95	proteasome	proteasome assembly	+	+	+	+
Q16630	Cleavage and polyadenylation specificity factor subunit 6	59210	6.66	nucleus	mRNA processing	+	-	+	-
Q58FF6	Putative heat shock protein HSP 90-beta 4	58264	4.65	cytoplasm	stress response	+	+	+	+
P48556	26S proteasome non-ATPase regulatory subunit 8	39612	9.73	proteasome	regulatory subunit of the 26S proteasome	-	-	+	+
P22234	Multifunctional protein ADE2	47079	6.94	cytosol	purine biosynthesis	+	+	+	+
O00299	Chloride intracellular channel protein 1	26923	5.09	cell membrane	unknown	+	+	+	+
P68104	Elongation factor 1-alpha 1	50141	9.1	cytoplasm	protein biosynthesis	+	+	+	+
Q5VTE0	Putative elongation factor 1-alpha-like 3	50185	9.15	cytoplasm	protein biosynthesis	+	+	+	+
P07864	L-lactate dehydrogenase C chain	36311	7.08	cytoplasm	glycolysis	+	+	+	+
Q6ZMR3	L-lactate dehydrogenase A-like 6A	36507	6.51	cytoplasm	glycolysis	+	+	+	+
P50990	T-complex protein 1 subunit theta	59621	5.41	cytoplasm	chaperone	+	+	+	+
Q9NY65	Tubulin alpha-8 chain	50094	4.94	cytoplasm	binds GTP (2 molecules)	+	+	+	+
Q15366	Poly(rC)-binding protein 2	38580	6.33	cytoplasm	Single-stranded nucleic acid binding protein	+	+	+	+
Q9NTK5	Obg-like ATPase 1	44744	7.64	cytoplasm	ATP catabolic process	+	+	+	+
P04080	Cystatin-B	11140	6.96	cytoplasm	proteinase inhibitor	+	+	+	+
Q9C005	Protein dpy-30 homolog	11250	4.84	Golgi apparatus	transcription	+	+	+	+
Q99714	3-hydroxyacyl-CoA dehydrogenase type-2	26923	7.65	mitochondrion	tRNA processing	+	+	+	+
P20618	Proteasome subunit beta type-1	26489	8.27	cytoplasm	host-virus interaction	+	+	+	+
P46940	Ras GTPase-activating-like protein IQGAP1	189252	6.08	cell membrane	signal transduction	+	+	+	+
P15259	Phosphoglycerate mutase 2	28766	8.99	cytosol	glycolysis	+	+	+	+
Q9BWJ5	Splicing factor 3B subunit 5	10135	5.89	nucleus	mRNA processing/mRNA splicing	+	+	+	+
O00232	26S proteasome non-ATPase regulatory subunit 12	52904	7.53	proteasome	regulatory subunit of the 26S proteasome	+	+	+	+
P41091	Eukaryotic translation initiation factor 2 subunit 3	51109	8.66	cytosol	protein biosynthesis	+	+	+	+
Q58FF7	Putative heat shock protein HSP 90-beta-3	68325	4.71	cytoplasm	stress response	+	+	+	+
Q06210	Glucosamine--fructose-6-phosphate aminotransferase [isomerizing] 1	78806	6.66	cytosol	protein glycosylation	+	+	+	+
Q9Y4Y9	U6 snRNA-associated Sm-like protein LSm5	9937	4.42	nucleus	mRNA processing/mRNA splicing	+	+	+	+
Q92526	T-complex protein 1 subunit zeta-2	57821	6.85	cytoplasm	chaperone	+	+	+	+
Q14011	Cold-inducible RNA-binding protein	18648	9.51	cytoplasm	stress response	+	+	+	+
Q9UKY7	Protein CDV3 homolog	27335	6.06	cytoplasm	cell proliferation	-	+	+	-
P22061	Protein-L-isoaspartate(D-aspartate) O-methyltransferase	24636	6.7	cytoplasm	methyl esterification	+	+	+	+
P07900	Heat shock protein HSP 90-alpha	84660	4.94	cytoplasm	stress response	+	+	+	+
P14625	Endoplasmin	92469	4.76	en reticulum	chaperone	+	+	+	+
P35998	26S protease regulatory subunit 7	48634	5.71	cytoplasm	host-virus interaction	+	+	+	+
Q9BRL6	Serine/arginine-rich splicing factor 8	32288	11.72	nucleus	mRNA processing/mRNA splicing	+	+	+	+
Q9Y224	UPF0568 protein C14orf166	28068	6.19	cytoplasm	host-virus interaction	-	+	+	-
P15927	Replication protein A 32 kDa subunit	29247	non esiste	nucleus	DNA damage,repair,recombination	+	+	+	-
P31150	Rab GDP dissociation inhibitor alpha	50583	5	cytoplasm	regulates GDP-GTP exchange reaction	+	+	+	+
P17174	Aspartate aminotransferase, cytoplasmic	46248	6.53	cytoplasm	aa metabolism	+	+	+	-
Q96FW1	Ubiquitin thioesterase OTUB1	31284	4.85	cytoplasm	adaptive immunity	+	+	+	+
Q9UNM6	26S proteasome non-ATPase regulatory subunit 13	42945	5.53	proteasome	Acts as a regulatory subunit of the 26 proteasome	+	+	+	+
O15371	Eukaryotic translation initiation factor 3 subunit D	63973	5.79	cytoplasm	protein biosynthesis	-	+	+	+
P0CG38	POTE ankyrin domain family member I	121282	5.83	unknown	unknown	+	+	+	+
Q92538	Golgi-specific brefeldin A-resistance guanine nucleotide exchange factor 1	206446	5.48	Golgi membrane	guanine-nucleotide exchange	+	+	+	+
P56192	Methionine--tRNA ligase, cytoplasmic	101116	5.82	cytoplasm	protein biosynthesis	+	+	+	+
Q8TAA3	Proteasome subunit alpha type-7-like	28530	9.07	cytoplasm	cleave peptides	+	+	+	+
Q99471	Prefoldin subunit 5	17328	5.94	cytoplasm	transfers proteins	+	+	+	+
Q8N0Y7	Probable phosphoglycerate mutase 4	28777	6.19	unknown	glycolysis	+	+	+	+
P30048	Thioredoxin-dependent peroxide reductase, mitochondrial	27693	7.68	mitochondrion	redox regulation of the cell	+	+	+	-
P06454	Prothymosin alpha	12203	3.66	nucleus	transcription	+	+	+	+
P49458	Signal recognition particle 9 kDa protein	10112	7.76	cytoplasm	signal recognition	+	+	+	+
P22102	Trifunctional purine biosynthetic protein adenosine-3	107767	6.26	cytosol	purine biosynthesis	+	+	+	+
O75369	Filamin-B	278164	5.47	cytoplasm	actin cytoskeleton organization	+	+	+	+
P49368	T-complex protein 1 subunit gamma	60534	6.1	cytoplasm	chaperone	+	+	+	+
P06744	Glucose-6-phosphate isomerase	63147	8.42	cytoplasm	glycolysis/gluconeogenesis	+	+	+	+
P49720	Proteasome subunit beta type-3	22949	6.13	cytoplasm	host-virus interaction	+	+	+	+
A5A3E0	POTE ankyrin domain family member F	121445	5.82	cytoplasm	unknown	+	+	+	+
Q6S8J3	POTE ankyrin domain family member E	121363	5.83	unknown	unknown	+	+	+	+
Q16658	Fascin	54530	6.84	cytoskeleton	actin filament bundle assembly	+	+	+	+
Q99798	Aconitate hydratase, mitochondrial	85425	7.36	mitochondrion	tricarboxylic acid cycle	+	+	+	-
P48643	T-complex protein 1 subunit epsilon	59671	5.44	cytoplasm	chaperone	+	+	+	+
Q9UI15	Transgelin-3	22473	6.84	unknown	central nervous development	+	+	+	+
P49588	Alanine--tRNA ligase, cytoplasmic	106810	5.34	cytoplasm	protein biosynthesis	+	+	+	+
P12956	X-ray repair cross-complementing protein 6	69843	6.23	chromosome	DNA damage,repair,recombination	+	+	+	+
O15212	Prefoldin subunit 6	14583	8.83	prefoldin compex	protein folding	+	+	+	+
P53004	Biliverdin reductase A	33428	6.06	cytoplasm	heme catabolic process	+	+	+	+
Q01518	Adenylyl cyclase-associated protein 1	51901	8.24	cell membrane	actin cytoskeleton organization	+	+	+	+
P61289	Proteasome activator complex subunit 3	29506	5.69	cytoplasm	apoptosis	+	+	+	-
Q01081	Splicing factor U2AF 35 kDa subunit	27872	9.09	nucleus	mRNA processing/mRNA splicing	+	+	+	+
Q14315	Filamin-C	291022	5.65	cytoplasm	cell junction assembly	+	+	+	+
P05198	Eukaryotic translation initiation factor 2 subunit 1	36112	5.01	cytosol	translation	+	+	+	+
Q9NRN7	L-aminoadipate-semialdehyde dehydrogenase-phosphopantetheinyl transferase	35776	6.35	cytoplasm	Catalyzes post-translational modifications	+	+	+	+
P34897	Serine hydroxymethyltransferase, mitochondrial	55993	8.76	mitochondrion	one-carbon metabolism	+	+	+	+
P14174	Macrophage migration inhibitory factor	12476	7.73	cytoplasm	immunity	+	+	+	+
Q14974	Importin subunit beta-1	97170	4.68	ctoplasm	host-virus interaction	+	+	+	+
P55795	Heterogeneous nuclear ribonucleoprotein H2	49264	5.89	nucleus	nuclear mRNA splicing	+	+	+	+
Q01130	Serine/arginine-rich splicing factor 2	25476	11.86	nucleus	mRNA processing/mRNA splicing	+	+	+	+
P16930	Fumarylacetoacetase	46374	6.46	cytosol	phe,tyr catabolism	+	+	+	+
Q13243	Serine/arginine-rich splicing factor 5	31264	11.59	nucleus	mRNA processing/mRNA splicing	+	+	+	+
P62333	26S protease regulatory subunit 10B	44173	7.09	cytoplasm	cell cycle	+	+	+	+
P55036	26S proteasome non-ATPase regulatory subunit 4	40737	4.68	proteasome	cell cycle	+	+	+	-
P08238	Heat shock protein HSP 90-beta	83264	4.96	cytoplasm	stress response	+	+	+	+
P0CG39	POTE ankyrin domain family member J	117390	5.66	unknown	unknown	+	+	+	+
Q9Y4Z0	U6 snRNA-associated Sm-like protein LSm4	15350	10.02	nucleus	mRNA processing/mRNA splicing	+	+	+	-
Q58FF8	Putative heat shock protein HSP 90-beta 2	44349	4.79	cytoplasm	stress response	+	+	+	+
P04083	Annexin A1	38714	6.57	cell membrane	exocytosis	+	+	+	+
P61204	ADP-ribosylation factor 3	20601	6.84	cytoplasm	protein transport	+	+	+	+
P84077	ADP-ribosylation factor 1	20697	6.31	cytoplasm	protein transport	+	+	+	+
P09012	U1 small nuclear ribonucleoprotein A	31280	9.83	nucleus	mRNA processing/mRNA splicing	-	+	+	+
P38919	Eukaryotic initiation factor 4A-III	46871	6.3	cytoplasm	translation	+	+	+	+
P62993	Growth factor receptor-bound protein 2	25206	5.89	cytoplasm	host-virus interaction	+	+	+	-
P20839	Inosine-5'-monophosphate dehydrogenase 1	55406	6.43	cytoplasm	purine biosynthesis	-	+	-	-
Q9BYX7	Putative beta-actin-like protein 3	42016	5.91	cytoplasm	platelet activation	+	+	+	+
Q04837	Single-stranded DNA-binding protein, mitochondrial	17260	9.59	mitochondrion	DNA replictaion	+	+	+	+
P33993	DNA replication licensing factor MCM7	81308	6.08	nucleus	DNA replication	+	+	+	+
Q15181	Inorganic pyrophosphatase	32600	5.54	cytoplasm	diphosphate metabolic process	+	+	+	+
P17812	CTP synthase 1	66690	6.02	cytosol	pyrimidine biosynthesis	+	+	+	+
P37198	Nuclear pore glycoprotein p62	53255	5.19	cytoplasm	protein transport	+	+	+	-
P28070	Proteasome subunit beta type-4	29204	5.7	cytoplasm	host-virus interaction	+	+	+	+
P52565	Rho GDP-dissociation inhibitor 1	23207	5.01	cytoplasm	GDP/GTP exchange reaction	+	+	+	+
Q13347	Eukaryotic translation initiation factor 3 subunit I	36502	5.38	cytoplasm	protein biosynthesis	+	+	+	+
Q9BRA2	Thioredoxin domain-containing protein 17	13941	5.38	cytoplasm	disulfide reductase	+	+	+	-
Q99729	Heterogeneous nuclear ribonucleoprotein A/B	36225	8.21	cytoplasm	binds single-stranded RNA	+	+	+	+
P61978	Heterogeneous nuclear ribonucleoprotein K	50976	5.39	cytoplasm	host-virus interaction	+	+	+	+
P39748	Flap endonuclease 1	42593	8.8	mitochondrion	DNA damage,repair,repliation	+	-	+	+
P63313	Thymosin beta-10	5026	5.31	cytoplasm	cytoskeleton organization	+	+	+	+
O60610	Protein diaphanous homolog 1	141347	5.31	cell membrane	hearing	+	+	+	+
P30153	Serine/threonine-protein phosphatase 2A 65 kDa regulatory subunit A alpha isoform	65309	5	centromere	chromosome partition	+	+	+	+
Q9ULC4	Malignant T-cell-amplified sequence 1	20555	8.98	cytoplasm	cell cycle	+	+	+	+
Q04323	UBX domain-containing protein 1	33325	5.23	cytoplasm	ubiquitin catabolic process	-	-	+	-
Q9H910	Hematological and neurological expressed 1-like protein	20063	9.3	cytoplasm	unknown	-	-	+	-
Q15436	Protein transport protein Sec23A	86161	6.64	en reticulum	protein transport	+	-	+	+
Q15437	Protein transport protein Sec23B	86479	6.43	en reticulum	protein transport	+	-	+	+
P61081	NEDD8-conjugating enzyme Ubc12	20900	7.57	unknown	Ubl conjugation pathway	+	+	+	+
P04075	Fructose-bisphosphate aldolase A	39420	8.3	cytosol	glycolysis	+	+	+	+
P57721	Poly(rC)-binding protein 3	39465	8.22	cytoplasm	Single-stranded nucleic acid binding protein	+	+	+	+
Q14103	Heterogeneous nuclear ribonucleoprotein D0	38434	7.61	cytoplasm	transcription	+	+	+	+
P37108	Signal recognition particle 14 kDa protein	14570	10.05	cytoplasm	targets secretory proteins to en reticulum	+	+	+	+
P62942	Peptidyl-prolyl cis-trans isomerase FKBP1A	11951	7.89	cytoplasm	protein folding	+	+	+	+
P62081	40S ribosomal protein S7	22127	10.09	cytosolic large ribosomal subunit	translation	+	+	+	-
P13010	X-ray repair cross-complementing protein 5	82705	5.55	chromosome	DNA damage,repair,recombination	+	+	+	+
P62316	Small nuclear ribonucleoprotein Sm D2	13527	9.92	nucleus	mRNA processing/mRNA splicing	+	+	+	+
P62136	Serine/threonine-protein phosphatase PP1-alpha catalytic subunit	37512	5.94	cytoplasm	carbohydrate metabolism	+	+	+	+
Q04760	Lactoylglutathione lyase	20778	5.12	cytoplasm	carbohydrate metabolism	+	+	+	+
O14979	Heterogeneous nuclear ribonucleoprotein D-like	46438	9.59	cytoplasm	transcription	+	+	+	+
P18669	Phosphoglycerate mutase 1	28804	6.67	cytosol	glycolysis	+	+	+	+
Q92598	Heat shock protein 105 kDa	96865	5.27	cytoplasm	stress response	-	+	+	-
P54577	Tyrosine--tRNA ligase, cytoplasmic	59143	6.61	cytoplasm	protein biosynthesis	+	+	+	+
P61221	ATP-binding cassette sub-family E member 1	67314	8.63	cytoplasm	host-virus interaction	+	+	+	+
P15313	V-type proton ATPase subunit B, kidney isoform	56833	5.44	membrane	ion, hydrogen transport	-	-	+	-
Q99832	T-complex protein 1 subunit eta	59367	7.55	cytoplasm	chaperone	+	+	+	+
P49736	DNA replication licensing factor MCM2	101986	5.34	nucleus	DNA replication	+	+	+	+
Q14444	Caprin-1	78366	5.14	cytoplasm	differentiation	+	+	+	+
P12270	Nucleoprotein TPR	267293	4.97	centromere	protein transport	+	+	+	+
P36873	serine/threonine-protein phosphatase PP1-gamma catalytic subunit	36984	6.12	cytoplasm	Carbohydrate metabolism	+	+	+	+
P62140	Serine/threonine-protein phosphatase PP1-beta catalytic subunit	37187	5.84	cytoplasm	Carbohydrate metabolism	+	+	+	+
P62195	26S protease regulatory subunit 8	45626	7.11	cytoplasm	degradation of ubiquitinated proteins	+	+	+	+
P43243	Matrin-3	94623	5.87	nucleus	transcription	+	+	+	+
Q13283	Ras GTPase-activating protein-binding protein 1	52164	5.36	cell membrane	transport	+	+	+	+
Q13492	Phosphatidylinositol-binding clathrin assembly protein	70755	7.7	Golgi apparatus	endocytosis	+	+	+	+
P84085	ADP-ribosylation factor 5	20530	6.3	cytoplasm	protein transport	+	+	+	+
P25205	DNA replication licensing factor MCM3	90981	5.53	nucleus	DNA replication	+	+	+	+
Q99613	Eukaryotic translation initiation factor 3 subunit C	105344	5.48	cytoplasm	protein biosynthesis	+	+	+	+
A8MWD9	Small nuclear ribonucleoprotein G-like protein	8544	8.93	nucleus	mRNA processing/mRNA splicing	+	+	+	+
P62308	Small nuclear ribonucleoprotein G	8496	8.98	nucleus	mRNA processing/mRNA splicing	+	+	+	+
Q00839	Heterogeneous nuclear ribonucleoprotein U	90584	5.76	cytoplasm	mRNA processing/mRNA splicing	+	+	+	+
P78527	DNA-dependent protein kinase catalytic subunit	469089	6.75	nucleus	DNA damage/recombination/repair	+	+	+	+
O15355	Protein phosphatase 1G	59272	4.27	cytoplasm	peptidyl-threonine dephosphorylation	+	+	+	+
P06132	Uroporphyrinogen decarboxylase	40787	5.77	cytoplasm	heme, porphyrin biosynthesis	+	+	+	+
P78371	T-complex protein 1 subunit beta	57488	6.01	cytoplasm	chaperone	+	+	+	+
O75347	Tubulin-specific chaperone A	12885	5.25	cytoplasm	folding protein	+	+	+	-
O75083	WD repeat-containing protein 1	66194	6.17	cytoplasm	disassembly of actin filaments	-	-	+	-
Q15056	Eukaryotic translation initiation factor 4H	27385	6.66	cytoplasm	protein biosynthesis	+	+	+	+
Q15370	Transcription elongation factor B polypeptide 2	13133	4.73	nucleus	transcription	+	+	+	+
P55072	Transitional endoplasmic reticulum ATPase	89322	5.14	cytoplasm	transport	+	+	+	+
P30043	Flavin reductase (NADPH)	22119	7.13	cytoplasm	oxidoreductase that catalyzes the NADPH-dependent reduction	+	+	+	+
P30154	Serine/threonine-protein phosphatase 2A 65 kDa regulatory subunit A beta isoform	66214	4.84	unknown	unknown	+	+	+	+
Q9Y333	U6 snRNA-associated Sm-like protein LSm2	10835	6.05	nucleus	mRNA processing/mRNA splicing	+	+	+	+
Q9Y266	Nuclear migration protein nudC	38243	5.27	cytoplasm	cell cycle	+	+	+	+
Q9Y5S9	RNA-binding protein 8A	19889	5.5	cytoplasm	translation regulation	+	+	+	+
P12268	Inosine-5'-monophosphate dehydrogenase 2	55805	6.44	cytoplasm	GMP,purine biosynthesis	+	+	+	+
P06576	ATP synthase subunit beta, mitochondrial	56560	5.26	membrane	ATP synthesis	+	+	+	+
Q13451	Peptidyl-prolyl cis-trans isomerase FKBP5	51212	5.71	cytoplasm	protein folding	-	-	+	+
P56537	Eukaryotic translation initiation factor 6	26599	4.56	cytoplasm	protein biosynthesis	+	+	+	+
Q9UBE0	SUMO-activating enzyme subunit 1	38450	5.17	nucleus	Ubl conjugation pathway	+	+	+	+
Q14566	DNA replication licensing factor MCM6	92889	5.28	nucleus	DNA replication	+	+	+	+
P84090	Enhancer of rudimentary homolog	12259	5.62	midbody	cell cycle	+	+	+	+
P17987	T-complex protein 1 subunit alpha	60344	5.8	cytoplasm	chaperone	+	+	+	+
P24844	Myosin regulatory light polypeptide 9	19827	4.78	cytosol	smooth muscle contractile activity	+	+	+	+
O00148	ATP-dependent RNA helicase DDX39A	49130	5.46	nucleus	mRNA processing/mRNA splicing	+	+	+	+
P54105	Methylosome subunit pICln	26215	3.97	cytoplasm	cell volume homeostasis	+	+	+	-
P18206	Vinculin	123799	5.5	cell membrane	cell adhesion	+	+	+	+
Q9UI30	tRNA methyltransferase 112 homolog	14199	5.21	protein complex	methylation	+	+	+	+
Q9NSD9	Phenylalanine--tRNA ligase beta subunit	66116	6.39	cytoplasm	protein biosynthesis	-	+	+	-
Q7Z4H3	HD domain-containing protein 2	23390	5.33	mitochondrion	metabolic process	+	+	+	+
P62318	Small nuclear ribonucleoprotein Sm D3	13916	10.33	nucleus	mRNA processing/mRNA splicing	+	+	+	+
P46783	40S ribosomal protein S10	18898	10.15	cytoplasm	translation	+	+	+	+
Q96AE4	Far upstream element-binding protein 1	67560	7.18	nucleus	transcription	+	+	+	+
Q9UHD1	Cysteine and histidine-rich domain-containing protein 1	37490	8.1	unknown	stress response	+	+	+	+
O00151	PDZ and LIM domain protein 1	36072	6.56	cytoskeleton	adapter for proteins in the cytoskeleton	+	+	+	+
P62314	Small nuclear ribonucleoprotein Sm D1	13282	11.56	nucleus	mRNA processing/mRNA splicing	+	+	+	+
P31943	Heterogeneous nuclear ribonucleoprotein H	49229	5.89	nucleus	mRNA processing/mRNA splicing	+	+	+	+
P11908	Ribose-phosphate pyrophosphokinase 2	34769	6.15	cytosol	nucleotide biosynthesis	+	+	+	+
Q14247	Src substrate cortactin	61586	5.24	cytoskeleton	actin cytoskeleton organization	+	+	+	+
Q04637	Eukaryotic translation initiation factor 4 gamma 1	175491	5.25	cytosol	translation	+	+	+	+
Q07666	KH domain-containing, RNA-binding, signal transduction-associated protein 1	48227	8.73	membrane	cell cycle	-	+	+	+
P52597	Heterogeneous nuclear ribonucleoprotein F	45672	5.37	nucleus	mRNA processing/mRNA splicing	+	+	+	+
P13796	Plastin-2	70288	5.29	cell membrane	activation of T-cells	+	+	+	+
Q13838	Spliceosome RNA helicase DDX39B	48991	5.44	nucleus	protein transport	+	+	+	+
P53396	ATP-citrate synthase	120839	6.95	cytoplasm	lipid synthesis	+	+	+	+
P21964	Catechol O-methyltransferase	30037	5.26	cell membrane	catecholamine metabolism	-	+	+	+
Q9UQ80	Proliferation-associated protein 2G4	43787	6.13	cytoplasm	transcription	+	+	+	+
P23193	Transcription elongation factor A protein 1	33970	8.65	nucleus	transcription	-	-	+	-
P39019	40S ribosomal protein S19	16060	10.31	nucleus	maturation of 40S ribosomal subunits	+	+	+	+
Q86VP6	Cullin-associated NEDD8-dissociated protein 1	136376	5.52	nucleus	transcription	-	-	+	+
Q9P287	BRCA2 and CDKN1A-interacting protein	35979	4.51	nucleus	cell cycle	+	+	+	+
Q6P2Q9	Pre-mRNA-processing-splicing factor 8	273600	8.95	nucleus	mRNA processing/mRNA splicing	-	-	+	-
P35520	Cystathionine beta-synthase	60587	6.2	cytoplasm	aa biosynthesis	+	+	+	+
O76003	Glutaredoxin-3	37432	5.31	cytoplasm	cell redox homeostasis	-	+	+	-
P08708	40S ribosomal protein S17	15550	9.85	cytosolic large ribosomal subunit	translation	+	+	+	+
P0CW22	40S ribosomal protein S17-like	15550	9.85	ribosome	translation	+	+	+	+
Q13066	G antigen 2B/2C	12786	4.34	unknown	unknown	+	+	+	+
Q6NT46	G antigen 2A	12785	4.37	unknown	unknown	+	+	+	+
P08865	40S ribosomal protein SA	32854	4.79	cytosolic large ribosomal subunit	translation	+	+	+	+
P18085	ADP-ribosylation factor 4	20511	6.6	Golgi apparatus	protein transport	-	-	+	-
P26368	Splicing factor U2AF 65 kDa subunit	53501	9.19	nucleus	mRNA processing/mRNA splicing	+	+	+	-
Q15637	Splicing factor 1	68330	9.07	nucleus	transcription	-	-	+	+
Q13177	Serine/threonine-protein kinase PAK 2	58043	5.69	cytoplasm	apoptosis	+	-	-	-
Q07955	Serine/arginine-rich splicing factor 1	27745	10.37	cytoplasm	mRNA processing/mRNA splicing	+	+	+	+
Q08J23	tRNA (cytosine(34)-C(5))-methyltransferase	86471	6.33	cytoplasm	cell cycle	+	+	+	-
O75643	U5 small nuclear ribonucleoprotein 200 kDa helicase	244508	5.73	nucleus	mRNA processing/mRNA splicing	+	-	+	+
Q4V326	G antigen 2E	12763	4.32	unknown	unknown	+	+	+	+
Q9UEU5	G antigen 2D	12764	4.23	unknown	cellular defense response	+	+	+	+
P62249	40S ribosomal protein S16	16445	10.21	cytosolic large ribosomal subunit	translation	+	+	+	+
P63220	40S ribosomal protein S21	9111	8.68	cytosolic large ribosomal subunit	translation	+	+	+	+
P63208	S-phase kinase-associated protein 1	18658	4.4	cytosol	ubiquitin catabolic process	+	+	+	+
Q86U42	Polyadenylate-binding protein 2	32749	5.04	cytoplasm	mRNA processing	-	-	+	+
O43776	Asparagine--tRNA ligase, cytoplasmic	62943	5.9	cytoplasm	protein biosynthesis	+	+	+	+
P62306	Small nuclear ribonucleoprotein F	9725	4.63	nucleus	mRNA processing/mRNA splicing	+	+	+	+
Q16543	Hsp90 co-chaperone Cdc37	44468	5.17	cytoplasm	chaperone	+	+	+	+
P20042	Eukaryotic translation initiation factor 2 subunit 2	38388	5.6	cytosol	protein biosynthesis	+	+	+	-
Q13155	Aminoacyl tRNA synthase complex-interacting multifunctional protein 2	35349	8.45	cytoplasm	apoptosis	+	+	-	-
O60739	Eukaryotic translation initiation factor 1b	12824	6.82	unknown	protein biosynthesis	+	+	+	+
P41567	Eukaryotic translation initiation factor 1	12732	6.9	cytoplasm	protein biosynthesis	+	+	+	+
Q92973	Transportin-1	102355	4.83	cytoplasm	protein transport	+	+	+	+
Q9NZI8	Insulin-like growth factor 2 mRNA-binding protein 1	63481	9.26	cytoplasm	translation regulation	+	+	+	+
Q9HB71	Calcyclin-binding protein	26210	8.28	cytoplasm	ubiquitin catabolic process	-	+	+	+
P55735	Protein SEC13 homolog	35541	5.22	cytoplasmic vesicle	protein transport	+	+	+	+
Q99439	Calponin-2	33697	6.94	stress fiber	smooth muscle contraction	+	+	+	+
P21333	Filamin-A	280739	5.7	cytoplasm	cilium biogenesis	+	+	+	+
Q9Y3B4	Pre-mRNA branch site protein p14	14585	9.41	nucleus	mRNA processing/mRNA splicing	-	+	+	+
P63279	SUMO-conjugating enzyme UBC9	18007	8.87	cytoplasm	cell cycle	+	+	+	+
P05783	Keratin, type I cytoskeletal 18	48058	5.34	intermediate filament/keratin	cell cycle	+	+	+	+
Q8NAB2	Kelch repeat and BTB domain-containing protein 3	69395	5.22	unknown	unknown	+	+	+	+
Q9UMS4	Pre-mRNA-processing factor 19	55181	6.14	cytoplasm	DNA damage,repair	+	+	+	+
Q00610	Clathrin heavy chain 1	191615	5.48	membrane	cellular membrane organization	+	+	+	+
O75821	Eukaryotic translation initiation factor 3 subunit G	35611	5.87	cytoplasm	protein biosynthesis	+	+	+	+
P26196	Probable ATP-dependent RNA helicase DDX6	54417	8.85	cytoplasm	mRNA decapping	+	+	+	+
P09234	U1 small nuclear ribonucleoprotein C	17394	9.72	nucleus	spliceosome assembly	+	+	+	+
Q08043	Alpha-actinin-3	103241	5.37	cytosol	anchors actin	-	-	+	+
Q15233	Non-POU domain-containing octamer-binding protein	54232	9.01	nucleus	DNA damage/recombination/repair	+	+	+	+
P46781	40S ribosomal protein S9	22591	10.66	cytosolic large ribosomal subunit	translation	-	+	+	+
P84103	Serine/arginine-rich splicing factor 3	19330	11.64	nucleus	mRNA processing/mRNA splicing	+	+	+	+
Q9H773	dCTP pyrophosphatase 1	18681	4.93	cytoplasm	hydrolysis dNTPs	+	+	+	+
P33991	DNA replication licensing factor MCM4	95558	6.28	nucleus	DNA replication	+	+	+	+
P07108	Acyl-CoA-binding protein	10044	6.12	en reticulum	transport	-	-	+	-
Q99417	C-Myc-binding protein	11967	5.69	cytoplasm	transcription	+	-	-	+
P49591	Serine--tRNA ligase, cytoplasmic	58777	6.05	cytoplasm	protein biosynthesis	+	+	+	+
P61923	Coatomer subunit zeta-1	20198	4.69	cytoplasm	protein transport	+	+	-	-
P55957	BH3-interacting domain death agonist	21995	5.25	cytoplasm	apoptosis	+	+	+	+
P62266	40S ribosomal protein S23	15808	10.5	cytosolic large ribosomal subunit	translation	-	+	+	+
P61247	40S ribosomal protein S3a	29945	9.75	cytosolic large ribosomal subunit	translation	+	+	+	+
P55209	Nucleosome assembly protein 1-like 1	45374	4.36	nucleus	nucleosome assembly	+	+	+	+
P27708	CAD protein	242984	6.02	cytoplasm	pyrimidine biosynthesis	+	-	+	+
P07741	Adenine phosphoribosyltransferase	19608	5.75	cytoplasm	purine salvage	+	+	+	+
P27816	Microtubule-associated protein 4	121005	5.32	cytoskeleton	microtubule assemby	-	+	-	+
Q01844	RNA-binding protein EWS	68478	9.37	cell membrane	transcription	+	+	+	+
P62269	40S ribosomal protein S18	17719	10.99	cytoplasm	translation	+	+	+	+
O43242	26S proteasome non-ATPase regulatory subunit 3	60978	8.47	proteasome	cell cycle	+	+	+	+
P08134	Rho-related GTP-binding protein RhoC	22006	6.2	cell membrane	signal transduction	+	+	+	-
P61586	Transforming protein RhoA	21768	5.83	cell membrane	cell cycle	+	+	+	-
Q13065	G antigen 1	15610	4.39	unknown	unknown	+	-	-	+
Q13068	G antigen 4	12885	4.12	unknown	unknown	+	-	-	+
P63244	Guanine nucleotide-binding protein subunit beta-2-like 1	35077	7.6	cell membrane	apoptosis	+	+	+	+
P62857	40S ribosomal protein S28	7841	10.7	cytosolic large ribosomal subunit	translation	+	+	+	+
P62841	40S ribosomal protein S15	17040	10.39	cytosolic large ribosomal subunit	translation	+	+	+	+
P83731	60S ribosomal protein L24	17779	11.26	cytosolic large ribosomal subunit	translation	+	+	+	+
O75533	Splicing factor 3B subunit 1	145830	6.65	nucleus	mRNA processing/mRNA splicing	+	+	+	+
P62304	Small nuclear ribonucleoprotein E	10804	9.46	nucleus	mRNA processing/mRNA splicing	+	+	+	+
P14866	Heterogeneous nuclear ribonucleoprotein L	64133	8.46	cytoplasm	nuclear mRNA splicing	+	+	+	+
P07814	Bifunctional glutamate/proline--tRNA ligase	170591	7.02	cytosol	protein biosynthesis	+	+	+	+
P32322	Pyrroline-5-carboxylate reductase 1, mitochondrial	33361	7.18	mitochondrion	aa biosynthesis	-	+	-	-
O76087	G antigen 7	12978	4.3	unknown	unknown	+	-	-	+
P0CL80	G antigen 12F	12978	4.3	unknown	unknown	+	-	-	+
P0CL81	G antigen 12G	12978	4.3	unknown	unknown	+	-	-	+
P0CL82	G antigen 12I	12978	4.3	unknown	unknown	+	-	-	+
Q15393	Splicing factor 3B subunit 3	135577	5.13	nucleus	mRNA processing/mRNA splicing	+	+	+	+
Q96DU9	Polyadenylate-binding protein 5	43331	9.55	cytoplasm	Binds the poly(A) tail of mRNA.	+	-	+	-
O60506	Heterogeneous nuclear ribonucleoprotein Q	69603	8.68	cytoplasm	host-virus interaction	+	+	+	+
Q15691	Microtubule-associated protein RP/EB family member 1	29999	5.02	cytoplasm	cell cycle	-	+	+	+
O95394	Phosphoacetylglucosamine mutase	59852	5.84	cytosol	carbonhydrate metabolism	+	+	+	-
P15880	40S ribosomal protein S2	31324	10.25	cytosolic large ribosomal subunit	translation	-	+	+	+
Q12906	Interleukin enhancer-binding factor 3	95338	8.86	cytoplasm	transcription	+	+	+	+
P62851	40S ribosomal protein S25	13742	10.12	cytosolic large ribosomal subunit	translation	+	+	+	+
P42766	60S ribosomal protein L35	14551	11.04	cytosolic large ribosomal subunit	translation	+	+	+	-
O43390	Heterogeneous nuclear ribonucleoprotein R	70943	8.23	cytoplasm	mRNA processing/mRNA splicing	+	+	+	+
P51665	26S proteasome non-ATPase regulatory subunit 7	37025	6.29	proteasome	cell cycle	+	+	+	+
P25398	40S ribosomal protein S12	14515	6.81	cytosolic large ribosomal subunit	translation	+	+	+	+
P62753	40S ribosomal protein S6	28681	10.85	cytosolic large ribosomal subunit	translation	+	+	+	+
P46060	Ran GTPase-activating protein 1	63542	4.63	centromere	signal transduction	+	+	+	+
P35268	60S ribosomal protein L22	14787	9.21	cytosolic large ribosomal subunit	translation	+	+	+	+
Q14978	Nucleolar and coiled-body phosphoprotein 1	73603	9.46	cytoplasm	nucleogenesis	+	+	+	+
P62701	40S ribosomal protein S4, X isoform	29598	10.16	cytosolic large ribosomal subunit	translation	+	+	+	+
Q5JNZ5	Putative 40S ribosomal protein S26-like 1	13002	10.55	ribosome	translation	+	+	+	+
P33992	DNA replication licensing factor MCM5	82286	8.64	nucleus	DNA replication	+	+	+	+
P62847	40S ribosomal protein S24	15423	10.79	cytosolic large ribosomal subunit	translation	+	+	+	+
Q13435	Splicing factor 3B subunit 2	100228	5.52	nucleus	host-virus interaction	-	+	+	-
P54687	Branched-chain-amino-acid aminotransferase, cytosolic	42966	5.17	cytoplasm	aa biosynthesis	+	+	+	+
P62854	40S ribosomal protein S26	13015	11.01	cytosolic small ribosomal subunit	translation	+	+	+	+
P62750	60S ribosomal protein L23a	17695	10.44	cytosolic large ribosomal subunit	translation	+	+	+	+
P19623	Spermidine synthase	33825	5.3	cytosol	spermidine biosynthesis	+	+	+	+
P55884	Eukaryotic translation initiation factor 3 subunit B	92482	4.89	cytoplasm	protein biosynthesis	+	+	+	+
P62263	40S ribosomal protein S14	16273	10.07	cytosolic large ribosomal subunit	translation	+	+	+	+
P17844	Probable ATP-dependent RNA helicase DDX5	69148	9.06	nucleus	transcription	+	+	+	+
Q92841	Probable ATP-dependent RNA helicase DDX17	80272	8.53	nucleus	transcription	+	+	+	+
P05387	60S acidic ribosomal protein P2	11665	4.38	cytosolic large ribosomal subunit	translation	+	+	+	+
Q13148	TAR DNA-binding protein 43	44740	5.85	nucleus	transcription	+	+	+	+
Q13310	Polyadenylate-binding protein 4	70783	9.31	cytoplasm	Binds the poly(A) tail of mRNA	+	+	+	+
P23246	Splicing factor, proline- and glutamine-rich	76149	9.45	cytopalsm	DNA damage,recomdination,repair	+	+	+	+
P46782	40S ribosomal protein S5	22876	9.73	cytosolic large ribosomal subunit	translation	+	+	+	+
P09661	U2 small nuclear ribonucleoprotein A'	28416	8.71	nucleus	mRNA processing/mRNA splicing	-	+	+	-
Q8NHW5	60S acidic ribosomal protein P0-like	34364	5.39	cytoplasm	translation	+	+	+	+
P83881	60S ribosomal protein L36a	12441	10.59	cytosolic large ribosomal subunit	translation	+	+	+	+
O95433	Activator of 90 kDa heat shock protein ATPase homolog 1	38274	5.41	cytoplasm	stress response	-	+	+	+
Q9BXJ9	N-alpha-acetyltransferase 15, NatA auxiliary subunit	101272	7.23	cytoplasm	angiogenesis	+	+	+	+
Q8N1G4	Leucine-rich repeat-containing protein 47	63473	8.55	unknown	unknown	+	-	+	-
P49327	Fatty acid synthase	273427	6.01	cytoplasm	fatty acid, lipid biosynthesis	+	+	+	+
P09651	Heterogeneous nuclear ribonucleoprotein A1	38747	9.17	cytoplasm	host-virus interaction	+	+	+	+
Q32P51	Heterogeneous nuclear ribonucleoprotein A1-like 2	34225	9.08	cytoplasm	transport	+	+	+	+
P62244	40S ribosomal protein S15a	14840	10.14	cytosolic small ribosomal subunit	translation	-	+	+	-
Q9Y285	Phenylalanine--tRNA ligase alpha subunit	57564	7.31	cytoplasm	protein biosynthesis	+	+	+	+
P04632	Calpain small subunit 1	28316	5.05	cell membrane	signal transduction	+	+	+	+
Q9Y2W1	Thyroid hormone receptor-associated protein 3	108666	10.16	nucleus	transcription	-	+	+	+
Q08211	ATP-dependent RNA helicase A	140958	6.41	cytoplasm	Unwinds double-stranded DNA and RNA in a 3' to 5' direction.	+	+	+	+
O15523	ATP-dependent RNA helicase DDX3Y	73154	7.24	cytoplasm	unknown	+	-	-	+
P62241	40S ribosomal protein S8	24205	10.32	cytosolic large ribosomal subunit	translation	+	+	+	+
P22090	40S ribosomal protein S4, Y isoform 1	29456	10.25	cytosolic large ribosomal subunit	translation	+	+	+	-
P46777	60S ribosomal protein L5	34363	9.73	cytosolic large ribosomal subunit	translation	+	+	+	+
P62899	60S ribosomal protein L31	14463	10.54	cytosolic large ribosomal subunit	translation	+	+	+	+
Q969Q0	60S ribosomal protein L36a-like	12469	10.67	cytoplasm	translation	-	-	+	+
Q96KB5	Lymphokine-activated killer T-cell-originated protein kinase	36085	4.98	unknown	mitosis	-	-	+	+
P11940	Polyadenylate-binding protein 1	70671	9.52	cytoplasm	mRNA processing/mRNA splicing	+	+	+	+
P62913	60S ribosomal protein L11	20252	9.64	nucleus	Binds to 5S ribosomal RNA	+	+	+	+
P38606	V-type proton ATPase catalytic subunit A	68304	5.34	cytosol	hydrogen ion transport	+	+	+	+
P62888	60S ribosomal protein L30	12784	9.65	cytosolic large ribosomal subunit	translation	+	+	+	+
P47914	60S ribosomal protein L29	17752	11.66	cytosolic large ribosomal subunit	translation	+	+	+	+
P62829	60S ribosomal protein L23	14865	10.51	cytosolic large ribosomal subunit	translation	+	+	+	+
P62424	60S ribosomal protein L7a	29996	10.61	cytosolic large ribosomal subunit	translation	+	+	+	+
Q8TD47	40S ribosomal protein S4, Y isoform 2	29295	10.1	ribosome	translation	+	+	+	-
P32929	Cystathionine gamma-lyase	44508	6.21	cytoplasm	aa biosynthesis	+	+	+	+
P54725	UV excision repair protein RAD23 homolog A	36609	4.54	nucleus	DNA damage,repair	+	+	+	+
P61254	60S ribosomal protein L26	17258	10.55	cytosolic large ribosomal subunit	translation	+	+	+	+
P08621	U1 small nuclear ribonucleoprotein 70 kDa	51557	9.94	nucleus	mRNA processing	+	+	+	+
P52272	Heterogeneous nuclear ribonucleoprotein M	77516	8.84	nucleus	mRNA processing/mRNA splicing	+	+	+	+
Q13643	Four and a half LIM domains protein 3	31192	5.79	nucleus	actin cytoskeleton organization	-	-	-	+
Q86UX7	Fermitin family homolog 3	75953	6.53	cell junction	cell adhesion	-	-	-	+
P05388	60S acidic ribosomal protein P0	34274	5.7	cytoplasm	host-virus interaction	+	+	+	+
Q4VXU2	Polyadenylate-binding protein 1-like	68392	9.06	unknown	unknown	+	+	+	+
P05386	60S acidic ribosomal protein P1	11514	4.21	cytosolic large ribosomal subunit	translation	+	+	+	+
P48147	Prolyl endopeptidase	80700	5.53	cytoplasm	proteolysis	-	-	+	-
Q15942	Zyxin	61277	6.22	cytoplasm	cell adhesion	+	+	+	+
P62906	60S ribosomal protein L10a	24831	9.94	cytosolic large ribosomal subunit	translation	+	+	+	+
Q13541	Eukaryotic translation initiation factor 4E-binding protein 1	12580	5.32	cytosol	translation	-	-	+	-
Q13067	G antigen 3	12937	4.19	unknown	unknown	+	+	+	+
Q13069	G antigen 5	12924	4.19	unknown	unknown	+	+	+	+
P46778	60S ribosomal protein L21	18565	10.49	cytosolic large ribosomal subunit	translation	+	+	+	+
Q9Y490	Talin-1	269767	5.77	cytoplasm	cytoskeleton organization	+	+	+	+
Q9UNX3	60S ribosomal protein L26-like 1	17256	10.55	cytosolic large ribosomal subunit	translation	+	+	+	+
P84098	60S ribosomal protein L19	23466	11.48	cytosolic large ribosomal subunit	translation	+	+	+	+
Q96PK6	RNA-binding protein 14	69492	9.68	nucleus	transcription	+	-	+	+
Q9H361	Polyadenylate-binding protein 3	70031	9.68	cytoplasm	Binds the poly(A) tail of mRNA	+	+	+	+
P62917	60S ribosomal protein L8	28025	11.04	cytoplasm	translation	+	+	+	+
Q96EP5	DAZ-associated protein 1	43383	8.73	cytoplasm	differentiation	+	+	+	+
P32969	60S ribosomal protein L9	21863	9.96	cytosolic large ribosomal subunit	translation	+	+	+	+
P18124	60S ribosomal protein L7	29226	10.66	cytosolic large ribosomal subunit	translation	+	+	+	+
P39023	60S ribosomal protein L3	46109	10.19	cytosolic large ribosomal subunit	translation	+	+	+	+
Q99733	Nucleosome assembly protein 1-like 4	42823	4.6	nucleus	nucleosome assembly	+	+	+	+
P06748	Nucleophosmin	32575	4.64	cytoplasm	host-virus interaction	+	+	+	+
P26599	Polypyrimidine tract-binding protein 1	57221	9.22	nucleus	mRNA processing/mRNA splicing	+	+	+	+
P61313	60S ribosomal protein L15	24146	11.62	cytosolic large ribosomal subunit	translation	+	+	+	+
Q9Y3Y2	Chromatin target of PRMT1 protein	26397	12,24	nucleus	transcription	-	-	+	-
P62277	40S ribosomal protein S13	17222	10.53	cytosolic large ribosomal subunit	translation	+	+	+	+
Q02790	Peptidyl-prolyl cis-trans isomerase FKBP4	51805	5.35	cytoplasm	PPIase and co-chaperone activities	+	+	+	+
Q92522	Histone H1x	22487	10.76	chromosome	nucleosome assembly	-	+	+	-
P46776	60S ribosomal protein L27a	16561	11	cytosolic large ribosomal subunit	translation	-	+	+	+
P62910	60S ribosomal protein L32	15860	11.32	cytosolic large ribosomal subunit	translation	+	+	+	+
P50914	60S ribosomal protein L14	23432	10.94	cytosolic large ribosomal subunit	translation	+	+	+	+
P30050	60S ribosomal protein L12	17819	9.48	cytosolic large ribosomal subunit	binds to 26S ribosomal RNA	+	+	+	+
Q13070	G antigen 6	12892	4.19	unknown	unknown	+	+	+	+
Q07020	60S ribosomal protein L18	21634	11.73	cytosolic large ribosomal subunit	translation	+	+	+	+
P25815	Protein S100-P	10400	4.75	cytoplasm	endothelian cell migration	+	+	+	+
Q12905	Interleukin enhancer-binding factor 2	43062	5.18	cytoplasm	transcription	+	+	+	+
P26373	60S ribosomal protein L13	24261	11.65	cytosolic large ribosomal subunit	translation	+	+	+	+
Q16222	UDP-N-acetylhexosamine pyrophosphorylase	58769	5.92	cytoplasm	post-translational modification	+	+	-	+
P49207	60S ribosomal protein L34	13293	11.48	cytosolic large ribosomal subunit	translation	+	+	+	+
O75390	Citrate synthase, mitochondrial	51712	8.45	mitochondrion	tricarboxylic acid cycle	+	+	+	+
Q9BQ39	ATP-dependent RNA helicase DDX50	82565	9.26	nucleus	unknown	+	+	+	+
P78417	Glutathione S-transferase omega-1	27566	6.24	cytoplasm	glutathione-dependent thiol transferase and dehydroascorbate reductase activities	+	+	+	+
P22626	Heterogeneous nuclear ribonucleoproteins A2/B1	37430	8.97	nucleus	mRNA processing/mRNA splicing	+	+	+	+
P61513	60S ribosomal protein L37a	10275	10.44	cytosolic large ribosomal subunit	translation	+	+	+	+
P27635	60S ribosomal protein L10	24604	10.11	cytosolic large ribosomal subunit	translation	+	+	+	+
P67809	Nuclease-sensitive element-binding protein 1	35924	9.87	cytoplasm	transcription	+	+	+	+
Q9NR30	Nucleolar RNA helicase 2	87344	9.32	nucleus	Can unwind double-stranded RNA	+	+	+	+
Q96L21	60S ribosomal protein L10-like	24519	10.03	cytosolic large ribosomal subunit	translation	+	+	+	+
P35637	RNA-binding protein FUS	53426	9.4	nucleus	binds DNA	+	+	+	+
O14744	Protein arginine N-methyltransferase 5	72684	5.88	cytoplasm	transcription	+	+	+	+
O75494	Serine/arginine-rich splicing factor 10	31301	11.26	cytoplasm	mRNA processing/mRNA splicing	+	+	+	+
Q92804	TATA-binding protein-associated factor 2N	61830	8.04	cytoplasm	transcription	+	+	+	+
Q86V81	THO complex subunit 4	26888	11.15	cytoplasm	host-virus interaction	+	+	+	+
Q16629	Serine/arginine-rich splicing factor 7	27367	11.83	nucleus	mRNA processing/mRNA splicing	+	+	+	+
Q5T1J5	Putative coiled-coil-helix-coiled-coil-helix domain-containing protein CHCHD2P9, mitochondrial	15490	9.95	mitochondrion	unknown	+	+	+	+
Q9Y6H1	Coiled-coil-helix-coiled-coil-helix domain-containing protein 2, mitochondrial	15513	9.43	mitochondrion	unknown	+	+	+	+
Q02543	60S ribosomal protein L18a	20762	10.72	cytosolic large ribosomal subunit	translation	+	+	+	+
Q9UGI8	Testin	47996	7.96	cell junction	cytoskeleton organization	+	+	+	+
P61353	60S ribosomal protein L27	15798	10.56	cytosolic large ribosomal subunit	translation	+	+	+	+
Q9Y3U8	60S ribosomal protein L36	12254	11.59	cytosolic large ribosomal subunit	translation	-	+	+	-
O75526	RNA-binding motif protein, X-linked-like-2	42814	10.33	nucleus	unknown	-	-	+	-
P08243	Asparagine synthetase [glutamine-hydrolyzing]	64370	6.39	cytosol	aa biosynthesis	+	+	+	+
Q15717	ELAV-like protein 1	36092	9.23	cytoplasm	mRNA metabolic process	+	+	+	+
O60812	Heterogeneous nuclear ribonucleoprotein C-like 1	32142	4.93	nucleus	nucleosome assembly	+	+	+	+
P07910	Heterogeneous nuclear ribonucleoproteins C1/C2	33670	4.95	nucleus	mRNA processing/mRNA splicing	+	+	+	+
O60884	DnaJ homolog subfamily A member 2	45746	6.06	membrane	chaperone	+	-	+	-
Q8N7X1	RNA-binding motif protein, X-linked-like-3	114938	9.19	unknown	unknown	-	-	+	-
P36578	60S ribosomal protein L4	47697	11.07	cytosolic large ribosomal subunit	translation	+	+	+	+
P38159	RNA-binding motif protein, X chromosome	42332	10.06	nucleus	transcription	+	+	+	+
Q96E39	RNA binding motif protein, X-linked-like-1	42142	9.9	nucleus	mRNA processing/mRNA splicing	+	+	+	+
Q02878	60S ribosomal protein L6	32728	10.59	cytosolic large ribosomal subunit	translation	+	+	+	+
Q15046	Lysine--tRNA ligase	68048	5.94	cell membrane	protein biosynthesis	+	+	+	+
P18621	60S ribosomal protein L17	21397	10.18	cytosolic large ribosomal subunit	translation	+	+	+	+
P26640	Valine--tRNA ligase	140476	7.53	cytosol	protein biosynthesis	+	+	+	+
Q13501	Sequestosome-1	47687	5.1	cytoplasm	apoptosis	+	+	+	+
P14678	Small nuclear ribonucleoprotein-associated proteins B and B'	24610	11.2	nucleus	mRNA processing/mRNA splicing	+	+	+	+
P63162	Small nuclear ribonucleoprotein-associated protein N	24614	11.2	nucleus	RNA splicing	+	+	+	+
P02765	Alpha-2-HS-glycoprotein	39325	5.43	secreted	mineral balance	+	+	+	+
P04264	Keratin, type II cytoskeletal 1	66039	8.15	cell membrane	regulate kinases activity	-	-	+	+
P60323	Nanos homolog 3	18844	9.17	cytoplasm	cell cycle	+	-	-	-
Q14152	Eukaryotic translation initiation factor 3 subunit A	166559	6.38	cytoplasm	protein biosynthesis	+	-	-	-
P11171	Protein 4.1	97017	5.41	cytoskeleton	stabilize erythrocyte membrane skeleton	+	+	-	-
O60907	F-box-like/WD repeat-containing protein TBL1X	62496	6.08	nucleus	transcription	+	-	-	-
Q9BQ87	F-box-like/WD repeat-containing protein TBL1Y	56688	5.33	nucleus	transcription	+	-	-	-
Q9BZK7	F-box-like/WD repeat-containing protein TBL1XR1	55595	5.28	nucleus	transcription	+	-	-	-
P04259	Keratin, type II cytoskeletal 6B	60067	8.09	intermediate filament/keratin	ectoderm development	+	+	+	+
O14929	Histone acetyltransferase type B catalytic subunit	49513	5.51	cytoplasm	acetylates histone H4	+	+	-	+
P68431	Histone H3.1	15404	11.13	chromosome	nucleosome component	+	-	-	+
P84243	Histone H3.3	15328	11.27	chromosome	nucleosome assembly	+	-	-	+
Q16695	Histone H3.1t	15508	11.13	chromosome	nucleosome assembly	+	-	-	+
Q6NXT2	Histone H3.3C	15214	11.11	chromosome	nucleosome assembly	+	-	-	+
Q71DI3	Histone H3.2	15388	11.27	chromosome	nucleosome assembly	+	-	-	+
P26641	Elongation factor 1-gamma	50119	6.25	cytosol	protein biosynthesis	+	+	-	+
O43423	Acidic leucine-rich nuclear phosphoprotein 32 family member C	26,76	4.14	unknown	unknown	+	+	-	-
P04040	Catalase	59756	6.9	peroxisome	protects from hydrogen peroxide	+	+	-	-
P48637	Glutathione synthetase	52385	5.67	cytosol	glutathione biosynthesis	+	+	-	-
P14550	Alcohol dehydrogenase [NADP(+)]	36573	6.32	cytosol	reduction of aromatic and aliphatic aldehydes	+	+	-	-
Q8NE71	ATP-binding cassette sub-family F member 1	95926	6.4	cytoplasm	mRNA translation initiation	+	-	-	-
Q96C23	Aldose 1-epimerase	37766	6.18	cytoplasm	carbohydrate metabolism	+	+	-	-
P68400	Casein kinase II subunit alpha	45144	7.29	plasma membrane	apoptosis	+	+	-	+
P78330	Phosphoserine phosphatase	25008	5.51	cytosol	aa biosynthesis	+	+	-	-
P60866	40S ribosomal protein S20	13373	9.95	cytosolic large ribosomal subunit	translation	+	+	-	+
Q9HAV4	Exportin-5	136311	5.56	cytoplasm	protein transport	+	-	-	-
Q14157	Ubiquitin-associated protein 2-like	114535	6.61	unknown	unknown	+	-	-	-
P35609	Alpha-actinin-2	103854	5.31	cytoplasm	anchors actin	+	+	-	+
P40123	Adenylyl cyclase-associated protein 2	52824	5.95	cell membrane	signal transduction	+	+	-	-
Q5JXB2	Putative ubiquitin-conjugating enzyme E2 N-like	17377	5.66	unknown	unknown	+	+	-	+
Q13442	28 kDa heat- and acid-stable phosphoprotein	20630	8.84	unknown	signal transduction	+	+	-	+
Q9Y3I0	tRNA-splicing ligase RtcB homolog	55210	6.77	cytoplasm	tRNA processing	+	+	-	+
O60271	C-Jun-amino-terminal kinase-interacting protein 4	146205	5.04	cytoplasm	signal transduction	+	-	-	-
O43583	Density-regulated protein	22092	5.21	unknown	translation	+	+	-	+
P09132	Signal recognition particle 19 kDa protein	16156	9.87	cytoplasm	binds 7S RNA	+	-	-	-
Q96KP4	Cytosolic non-specific dipeptidase	52878	5.65	cytoplasm	dipeptide hydrolysis	+	-	-	-
Q8IYB3	Serine/arginine repetitive matrix protein 1	102335	11.84	nucleus	mRNA processing/mRNA splicing	+	-	-	+
O15247	Chloride intracellular channel protein 2	28356	5.44	cytoplasm	ion transport	+	+	-	+
P43034	Platelet-activating factor acetylhydrolase IB subunit alpha	46638	6.97	membrane	cell cycle	+	-	-	-
P51991	Heterogeneous nuclear ribonucleoprotein A3	39595	9.1	nucleus	mRNA processing/mRNA splicing	+	+	-	+
P21980	Protein-glutamine gamma-glutamyltransferase 2	77329	5.11	plasma membrane	cross linking of proteins	+	+	-	-
A0AVT1	Ubiquitin-like modifier-activating enzyme 6	117970	5.76	cytoplasm	Ubl conjugation pathway	+	-	-	-
Q15029	116 kDa U5 small nuclear ribonucleoprotein component	109436	4.84	nucleus	mRNA processing/mRNA splicing	+	+	-	+
Q9Y3F4	Serine-threonine kinase receptor-associated protein	38438	4.98	cytoplasm	mRNA processing/mRNA splicing	+	+	-	+
Q8WVJ2	NudC domain-containing protein 2	17676	4.99	cytoplasm	unknown	+	-	-	-
Q9UHX1	Poly(U)-binding-splicing factor PUF60	59875	5.19	nucleus	apoptosis	+	+	-	+
Q15459	Splicing factor 3A subunit 1	88886	5.51	nucleus	mRNA processing/mRNA splicing	+	-	-	-
Q13630	GDP-L-fucose synthase	35893	6.12	cytoplasm	GDP-mannose to GDP-fucose	+	-	-	-
P62995	Transformer-2 protein homolog beta	33666	11.25	nucleus	mRNA processing/mRNA splicing	+	+	-	+
Q9Y4E8	Ubiquitin carboxyl-terminal hydrolase 15	112419	5.06	unknown	Ubl conjugation pathway	+	-	-	-
O75937	DnaJ homolog subfamily C member 8	29842	9.04	nucleoplasm	nuclear mRNA splicing	+	-	-	+
Q9NX58	Cell growth-regulating nucleolar protein	43615	9.57	nucleus	unknown	+	-	-	-
P54136	Arginine--tRNA ligase, cytoplasmic	73379	6.26	cytoplasm	protein biosynthesis	+	+	-	+
O15372	Eukaryotic translation initiation factor 3 subunit H	39930	6.09	cytoplasm	protein biosynthesis	+	-	-	+
Q12904	Aminoacyl tRNA synthase complex-interacting multifunctional protein 1	34353	8.61	unknown	unknown	+	+	-	-
O95197	Reticulon-3	112611	4.84	membrane	apoptosis	+	-	-	-
O00425	Insulin-like growth factor 2 mRNA-binding protein 3	63705	8.99	cytoplasm	translation regulation	+	-	-	+
Q9Y262	Eukaryotic translation initiation factor 3 subunit L	66727	5.93	cytoplasm	protein biosynthesis	+	-	-	+
Q9NUU7	ATP-dependent RNA helicase DDX19A	53975	6.2	cytoplasm	protein,mRNA transport	+	-	-	-
Q9UMR2	ATP-dependent RNA helicase DDX19B	53927	5.96	cytoplasm	protein,mRNA transport	+	-	-	-
P16989	DNA-binding protein A	40090	9.77	cytoplasm	transcription	+	+	-	-
O95747	Serine/threonine-protein kinase OSR1	58022	6.03	cytoplasm	stress response	+	+	-	-
P54727	UV excision repair protein RAD23 homolog B	43171	4.77	nucleus	DNA damage,repair	+	+	-	-
P30740	Leukocyte elastase inhibitor	42742	5.9	cytoplasm	proteolysis	+	-	-	+
Q5T4S7	E3 ubiquitin-protein ligase UBR4	573841	5.7	cytoplasm	Ubl conjugation pathway	+	+	-	-
Q16401	26S proteasome non-ATPase regulatory subunit 5	56196	5.34	cytosol	chaperone	+	-	-	-
Q96DG6	Carboxymethylenebutenolidase homolog	28048	6.71	cytoplasm	Cysteine hydrolase	+	+	-	+
Q15369	Transcription elongation factor B polypeptide 1	12473	4.74	nucleus	transcription	+	+	-	+
P08397	Porphobilinogen deaminase	39330	6.68	cytoplasm	heme,porphyrin biosynthesis	+	+	-	+
Q92901	60S ribosomal protein L3-like	46296	10.45	cytosolic large ribosomal subunit	translation	+	+	-	-
O60763	General vesicular transport factor p115	107895	4.85	membrane	protein transport	+	-	-	-
P46779	60S ribosomal protein L28	15748	12.02	cytosolic large ribosomal subunit	translation	+	+	-	+
P18077	60S ribosomal protein L35a	12538	11.07	cytosolic large ribosomal subunit	translation	+	+	-	+
Q9NQC3	Reticulon-4	129931	4.42	en reticulum	neurogenesis	+	+	-	+
O75914	Serine/threonine-protein kinase PAK 3	62310	5.33	cytoplasm	different signaling pathways	+	-	-	-
Q13153	Serine/threonine-protein kinase PAK 1	60647	5.55	cytoplasm	apoptosis	+	-	-	-
A6NEC2	Puromycin-sensitive aminopeptidase-like protein	53747	5.17	unknown	proteolysis	+	+	-	+
Q9UK76	Hematological and neurological expressed 1 protein	16015	5.47	nucleus	unknown	+	-	-	+
O95777	N-alpha-acetyltransferase 38, NatC auxiliary subunit	10403	4.34	nucleus	mRNA processing/mRNA splicing	+	+	-	+
P46926	Glucosamine-6-phosphate isomerase 1	32669	6.42	cytoplasm	carbohydrate metabolism	+	+	-	-
Q00577	Transcriptional activator protein Pur-alpha	34911	6.06	nucleus	transcription	+	-	-	-
Q9UHV9	Prefoldin subunit 2	16648	6.2	cytoplasm	transfers target proteins	+	+	-	+
Q58FF3	Putative endoplasmin-like protein	45859	5.14	unknown	stress response	+	-	-	+
Q14061	Cytochrome c oxidase copper chaperone	6915	6.8	mitochondrion	chaperone	+	+	-	+
Q9UMX0	Ubiquilin-1	62519	5.02	cytoplasm	apoptosis	+	-	-	-
O95336	6-phosphogluconolactonase	27547	5.7	cytoplasm	pentose-phosphate shunt	+	+	-	+
P08727	Keratin, type I cytoskeletal 19	44106	5.05	intermediate filament	host-virus interaction	+	-	-	-
Q06203	Amidophosphoribosyltransferase	57399	6.3	cytosol	purine biosynthesis	+	-	-	-
P47897	Glutamine--tRNA ligase	87799	6.71	cytoplasm	protein biosynthesis	+	-	-	-
P25705	ATP synthase subunit alpha, mitochondrial	59751	9.16	cell membrane	ATP synthesis	-	+	-	+
Q9H4A4	Aminopeptidase B	72596	5.51	secreted	removes arginine and/or lysine residues from the N-terminus of several peptide substrates	-	-	-	+
P27216	Annexin A13	35415	5.47	cell membrane	cell differentiation	-	+	-	+
P05937	Calbindin	30025	4.7	cytosol	Buffers cytosolic calcium	-	+	-	+
Q9Y295	Developmentally-regulated GTP-binding protein 1	40542	9	cytoplasm	regulator of cell growth	-	-	-	+
O43447	Peptidyl-prolyl cis-trans isomerase H	19208	8.28	cytoplasm	mRNA processing/mRNA splicing	-	+	-	+
P15559	NAD(P)H dehydrogenase [quinone] 1	30868	8.91	cytoplasm	quinone reductase	-	-	-	+
Q9BRF8	Calcineurin-like phosphoesterase domain-containing protein 1	35548	5.79	unknown	unknown	-	+	-	+
P35658	Nuclear pore complex protein Nup214	213620	7.15	nucleus	transport	-	-	-	+
O75400	Pre-mRNA-processing factor 40 homolog A	108805	7.18	nucleus	cell cycle	-	-	-	+
P62633	Cellular nucleic acid-binding protein	19463	8	en reticulum	transcription	-	-	-	+
O95232	Luc7-like protein 3	51466	9.81	nucleus	mRNA processing/mRNA splicing	-	+	-	+
O15144	Actin-related protein 2/3 complex subunit 2	34333	6.84	cytoplasm	actin polymerization	-	-	-	+
O60925	Prefoldin subunit 1	14210	6.32	prefoldin compex	transfers target proteins	-	-	-	+
P40121	Macrophage-capping protein	38499	5.82	cytoplasm	blocks the barbed ends of actin filaments	-	+	-	+
P53618	Coatomer subunit beta	107142	5.72	cell membrane	ER-Golgi transport	-	-	-	+
O75607	Nucleoplasmin-3	19344	4.55	nucleus	chaperone	-	-	-	+
P31949	Protein S100-A11	11740	6.56	cytoplasm	signal transduction	-	+	-	+
O95816	BAG family molecular chaperone regulator 2	23772	6.25	unknown	protein folding	-	+	-	+
O00487	26S proteasome non-ATPase regulatory subunit 14	34577	6.06	proteasome	Ubl conjugation pathway	-	+	-	+
P02042	Hemoglobin subunit delta	16055	7.84	hemoglobin complex	oxygen transport	-	-	-	+
P68871	Hemoglobin subunit beta	15998	6.74	hemoglobin complex	oxygen transport	-	-	-	+
P42126	Enoyl-CoA delta isomerase 1, mitochondrial	32816	8.8	mitochondrion	fatty acid, lipid metabolism	-	-	-	+
O00154	Cytosolic acyl coenzyme A thioester hydrolase	41796	8.85	cytoplasm	translation	-	-	-	+
O14579	Coatomer subunit epsilon	34482	4.98	membrane	protein transport	-	-	-	+
Q15102	Platelet-activating factor acetylhydrolase IB subunit gamma	25734	6.33	cytoplasm	lipid metabolism	-	-	-	+
P62280	40S ribosomal protein S11	18431	10.31	cytosolic small ribosomal subunit	translation	-	+	-	+
Q58FG0	Putative heat shock protein HSP 90-alpha A5	38738	6.15	cytoplasm	stress response	-	-	-	+
P14324	Farnesyl pyrophosphate synthase	48275	5.83	cytoplasm	steroid iosynthesis, metabolism	-	+	-	+
P27695	DNA-(apurinic or apyrimidinic site) lyase	35555	8.33	mitochondrion	DNA damage,repair,recombination	-	-	-	+
O95373	Importin-7	119517	4.7	cytoplasm	host-virus interaction	-	-	-	+
Q00688	Peptidyl-prolyl cis-trans isomerase FKBP3	25177	9.29	nucleus	protein folding	-	-	-	+
P42677	40S ribosomal protein S27	9461	9.57	cytosolic small ribosomal subunit	translation	-	+	-	+
Q71UM5	40S ribosomal protein S27-like	9477	9.57	ribosome	translation	-	+	-	+
P55769	NHP2-like protein 1	14174	8.72	nucleus	mRNA processing/mRNA splicing	-	+	-	+
Q92900	Regulator of nonsense transcripts 1	124345	6.18	cytoplasm	mRNA decay	-	-	-	+
Q14204	Cytoplasmic dynein 1 heavy chain 1	532408	6.01	cytoplasm	transport	-	-	-	+
P23526	Adenosylhomocysteinase	47716	5.92	cytoplasm	one carbon metabolism	+	+	+	+
P78344	Eukaryotic translation initiation factor 4 gamma 2	102362	6.69	cytosol	protein biosynthesis	-	-	-	+
O75312	Zinc finger protein ZPR1	50925	4.66	cytoplasm	signal transduction	-	-	-	+
Q8WW01	tRNA-splicing endonuclease subunit Sen15	18641	4.46	nucleus	mRNA processing	-	+	-	+
Q3MJ13	WD repeat-containing protein 72	123425	6.22	unknown	unknown	-	-	-	+
Q14151	Scaffold attachment factor B2	107473	5.84	cytoplasm	transcription	-	-	-	+
Q15424	Scaffold attachment factor B1	102642	5.32	nucleus	transcription	-	-	-	+
Q9UG63	ATP-binding cassette sub-family F member 2	71290	6.95	mitochondrial envelope	ATP catabolic process	-	-	-	+
O00567	Nucleolar protein 56	66050	9.24	cytoplasm	ribosome biogenesis	-	-	-	+
Q14137	Ribosome biogenesis protein BOP1	83630	5.8	nucleus	ribosome biogenesis	-	-	-	+
P35908	Keratin, type II cytoskeletal 2 epidermal	65433	8.07	intermediate filament/keratin	terminal cornification	-	-	-	+
P02533	Keratin, type I cytoskeletal 14	51561	5.09	intermediate filament/keratin	epidermis development	-	-	-	+
P08779	Keratin, type I cytoskeletal 16	51268	4.98	intermediate filament/keratin	cytoskeleton organization	-	-	-	+
P13645	Keratin, type I cytoskeletal 10	58827	5.13	intermediate filament/keratin	cellular response to Ca ions	-	-	-	+
Q7Z3Y7	Keratin, type I cytoskeletal 28	50567	5.33	intermediate filament/keratin	unknown	-	-	-	+
Q7Z3Y8	Keratin, type I cytoskeletal 27	49822	4.98	intermediate filament/keratin	hair follicle morphogenesis	-	-	-	+
Q7Z3Y9	Keratin, type I cytoskeletal 26	51911	4.86	intermediate filament/keratin	unknown	-	-	-	+
Q7Z3Z0	Keratin, type I cytoskeletal 25	49318	5	intermediate filament/keratin	hair follicle morphogenesis	-	-	-	+
P23497	Nuclear autoantigen Sp-100	100417	8.49	nucleus	host-virus interaction	-	+	-	-
Q53EL6	Programmed cell death protein 4	51735	5.07	cytoplasm	apoptosis	-	+	-	-
P63165	Small ubiquitin-related modifier 1	11557	5.34	cytoplasm	ubiquitin catabolic process	-	+	-	-
A2A3N6	Putative PIP5K1A and PSMD4-like protein	95048	5.46	cytoplasm	Ppinositol phosphorylation	-	+	-	-
Q13547	Histone deacetylase 1	55103	5.31	nucleus	host-virus interaction	-	+	-	-
Q9HC38	Glyoxalase domain-containing protein 4	34793	5.4	mitochondrion	unknown	-	+	-	-
Q5VWZ2	Lysophospholipase-like protein 1	26316	7.71	cytoplasm	hydrolysis of peptide substrates	-	+	-	-
Q9Y316	Protein MEMO1	33733	6.66	nucleus	regulation microtubule process	-	+	-	-
P09874	Poly [ADP-ribose] polymerase 1	113084	8.99	nucleus	DNA damage,repair,recombination	-	+	-	-
Q9C010	cAMP-dependent protein kinase inhibitor beta	8468	4.76	unknown	inhibitor of cAMP-dependent protein kinase activity	-	+	-	-
Q8N163	DBIRD complex subunit KIAA1967	102902	5.14	nucleus	apoptosis	-	+	-	-
O43488	Aflatoxin B1 aldehyde reductase member 2	39589	6.7	cytoplasm	carbohydrate metabolism	-	+	-	-
Q58FG1	Putative heat shock protein HSP 90-alpha A4	47712	5.07	cytoplasm	stress response	-	+	-	-
P13798	Acylamino-acid-releasing enzyme	81225	5.29	cytoplasm	proteolysis	-	+	-	-
P50897	Palmitoyl-protein thioesterase 1	34193	6.07	lysosome	vision	-	+	-	-
Q9Y5Y2	Cytosolic Fe-S cluster assembly factor NUBP2	28825	5.55	cytoplasm	maturation of extramitochondrial Fe/S proteins	-	+	-	-
Q93009	Ubiquitin carboxyl-terminal hydrolase 7	128302	5.33	nucleus	DNA damage,repair	-	+	-	-
Q14166	Tubulin--tyrosine ligase-like protein 12	74404	5.33	unknown	cellular protein modification process	-	+	-	-
O76021	Ribosomal L1 domain-containing protein 1	54973	10.13	nucleus	translation	-	+	-	-
P61163	Alpha-centractin	42614	6.19	cytoplasm	microtubule vesicle motility	-	+	-	-
O00629	Importin subunit alpha-4	57887	4.8	cytoplasm	protein transport	-	+	-	-
O95372	Acyl-protein thioesterase 2	24737	6.74	cytoplasm	fatty acid, lipid metabolism	-	+	-	-
P02768	Serum albumin	67367	5.92	secreted	regulation of osmotic blood pressure	-	+	-	-
